# Supplementary material for: High Hemin Concentration Induces Escape from Senescence of Normoxic and Hypoxic Colon Cancer Cells
Source: MDPI journal article supplement (doi:10.3390/cancers14194793), 2022-09-30
Supplement: s1 [file s1]

**Representative blots showing raw data of protein expression analysis:**

(**1–11**) in HCT116 cells treated with 2.5  $\mu$ M IRINO and exposed to 1, 10 or 100  $\mu$ M hemin: (1) HO-1; (2) CAT; (3) GPx-1; (4) cyclin A; (5) cyclin B; (6) p-cdc2; (7) p-Rb; (8) p21; (9) p-S6; (10) PARP-1; (11)  $\gamma$ -H2AX; (**12–24**) in HCT116 treated with 2.5  $\mu$ M IRINO and exposed to 5 or 10  $\mu$ M H2O2 and collected after 4th and 7th days of the experiment: (12) HO-1; (13) CAT; (14) GPx-1; (15) cyclin A; (16) cyclin B; (17) p-cdc2; (18) p-Rb; (19) p21; (20) p-S6; (21) p53; (22) E-cadherin; (23) Snail; (24) Nanog; (**25–37**) in HCT116 cells treated with 2.5  $\mu$ M IRINO and exposed to 100  $\mu$ M hemin, where antioxidative enzymes: HO-1, CAT or GPx-1 were silenced with use of siRNAs: (25) HO-1; (26) CAT; (27) GPx-1; (28) cyclin A; (29) cyclin B; (30) p-cdc2; (31) pRb; (32) p21; (33) p-S6; (34) PARP-1; (35) E-cadherin; (36) Snail; (37) Nanog; (**38–51**) in HCT116 cells treated with 2.5  $\mu$ M IRINO and exposed to 100  $\mu$ M hemin, where CAT was silenced with use of siRNAs, cells were cultured in normoxia or hypoxia: (38) HO-1; (39) CAT; (40) GPx-1; (41) cyclin A; (42) cyclin B; (43) p-cdc2; (44) p-Rb; (45) p21; (46) p-S6; (47) PARP-1; (48) p53; (49) E-cadherin; (50) Snail; (51) Nanog.

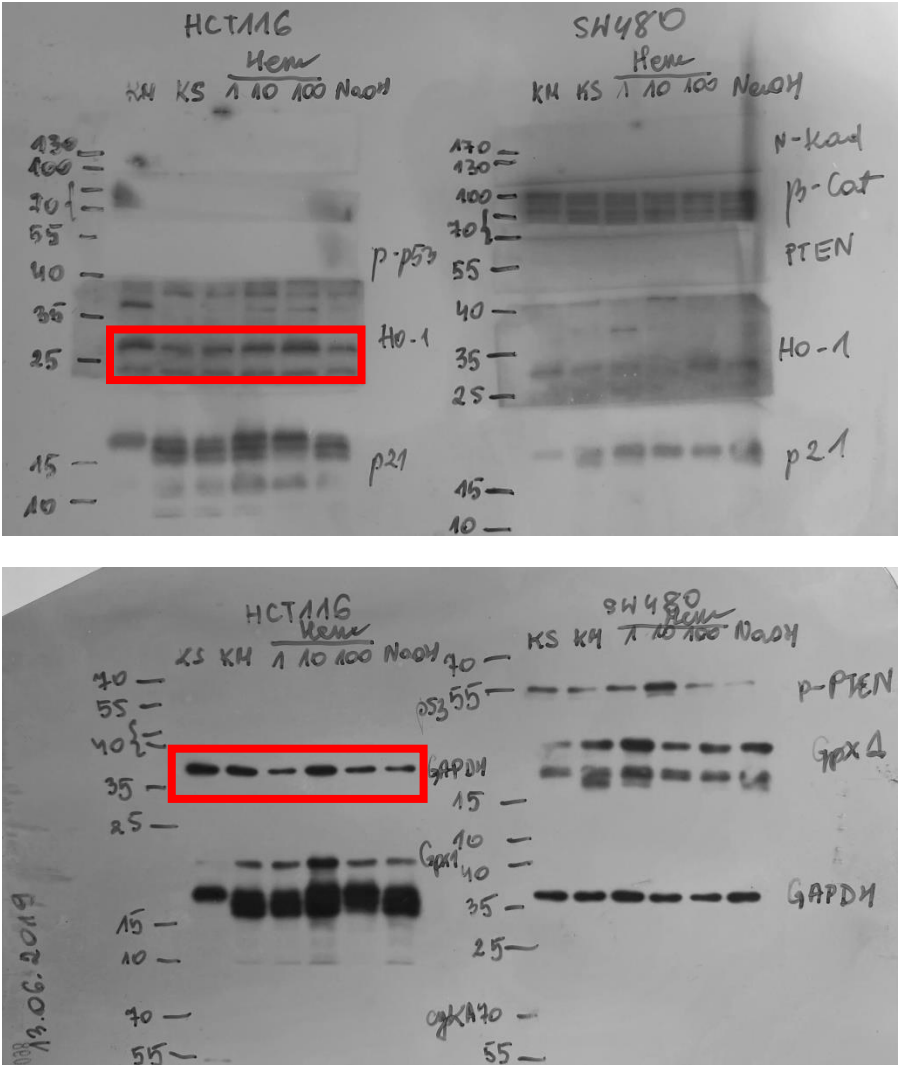

KM – Untreated Control  
KS – Irinotecan  
1 – Irinotecan + 1 uM Hemin  
10 – Irinotecan + 10 uM Hemin  
100 – Irinotecan + 100 uM Hemin  
NaOH – Irinotecan + NaOH

Fig. A.II.1

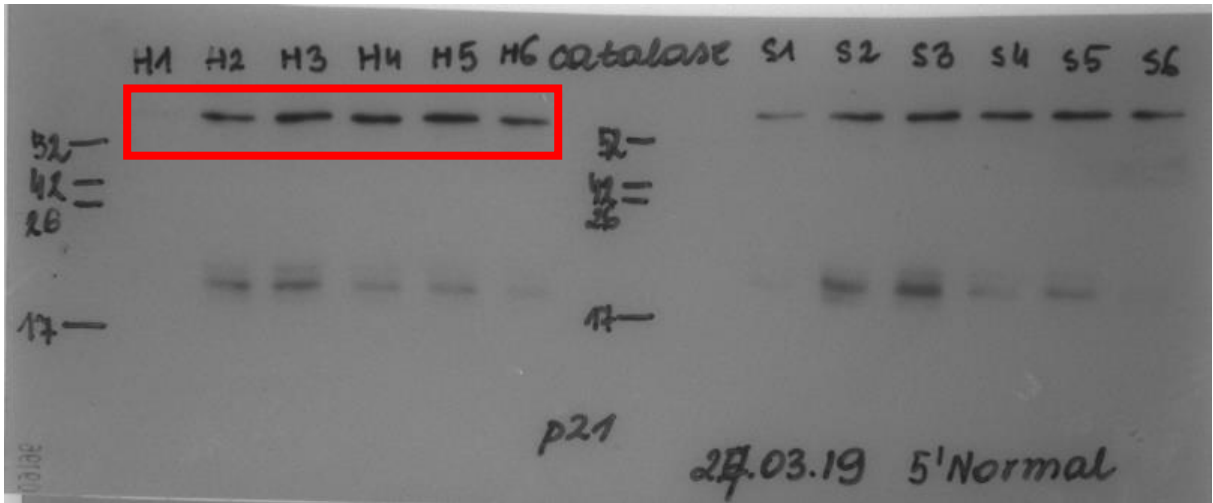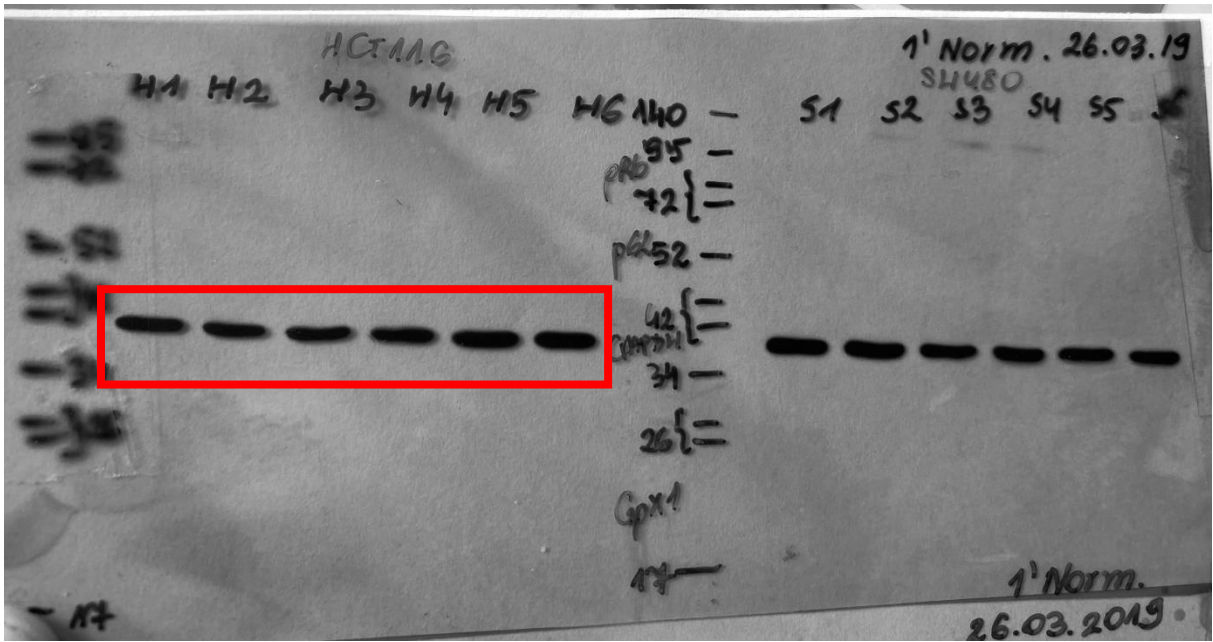

H1 – Untreated Control  
H2 – Irinotecan  
H3 – Irinotecan + 1 uM Hemin  
H4 – Irinotecan + 10 uM Hemin  
H5 – Irinotecan + 100 uM Hemin  
H6 – Irinotecan + NaOH

Fig. A.II.2

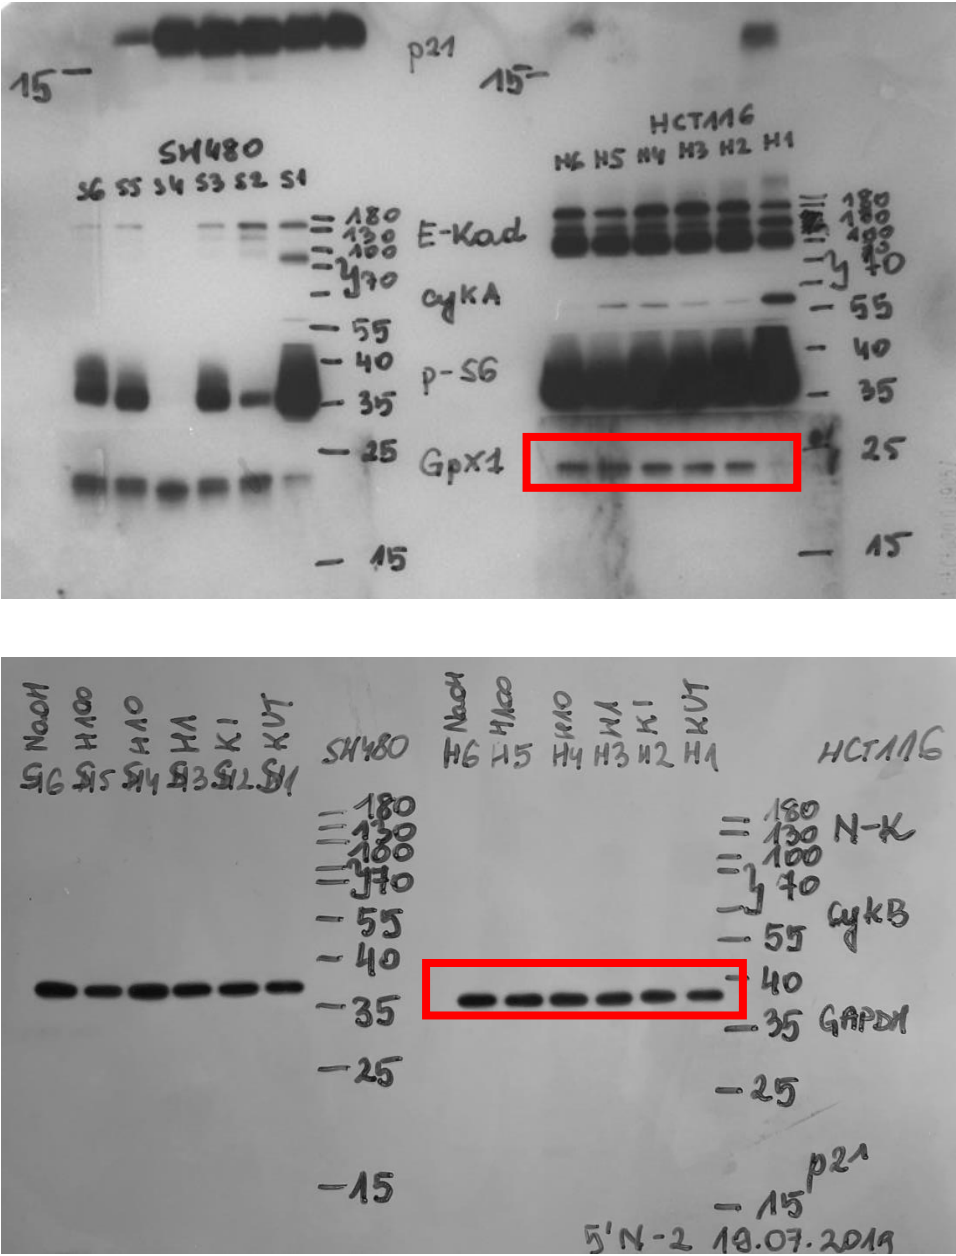

H1 – Untreated Control  
H2 – Irinotecan  
H3 – Irinotecan + 1 uM Hemin  
H4 – Irinotecan + 10 uM Hemin  
H5 – Irinotecan + 100 uM Hemin  
H6 – Irinotecan + NaOH

Fig. A.II.3

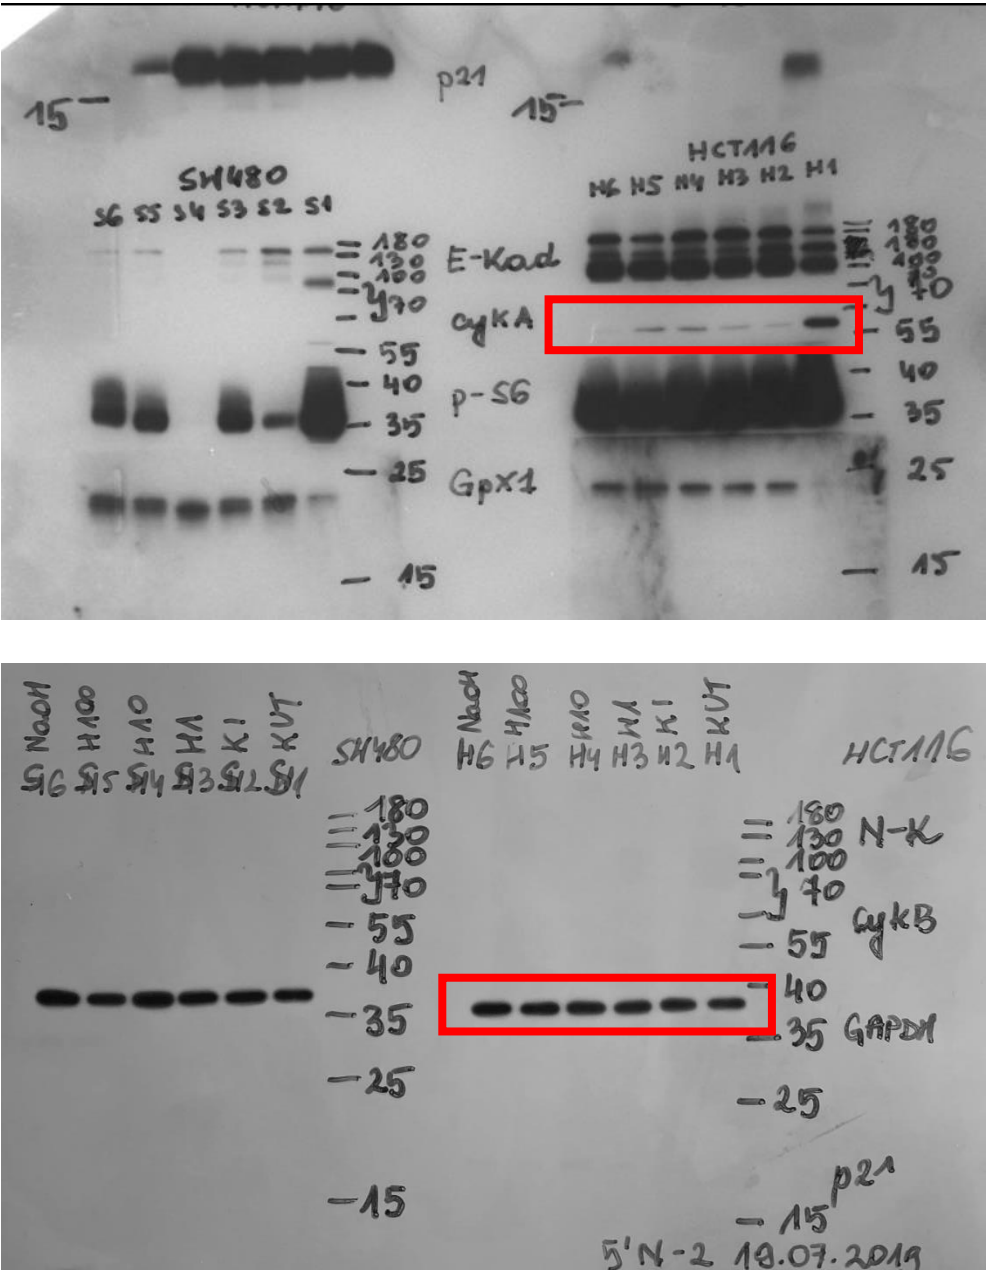

H1 – Untreated Control  
H2 – Irinotecan  
H3 – Irinotecan + 1 uM Hemin  
H4 – Irinotecan + 10 uM Hemin  
H5 – Irinotecan + 100 uM Hemin  
H6 – Irinotecan + NaOH

Fig. A.II.4

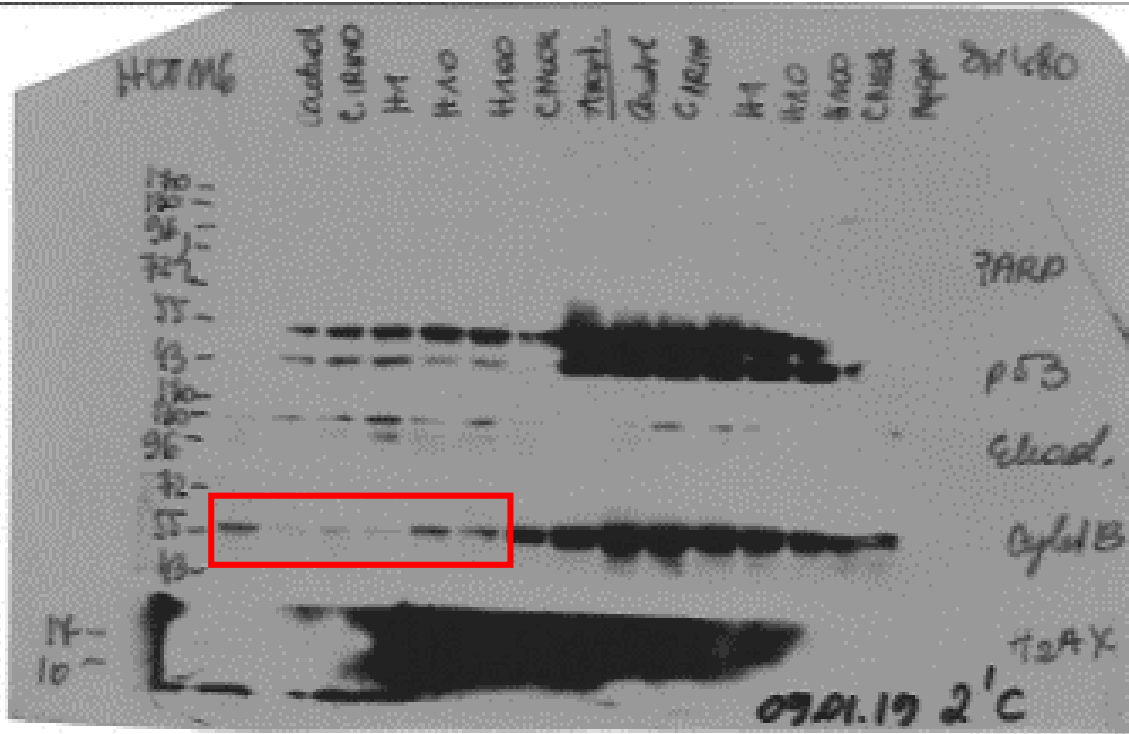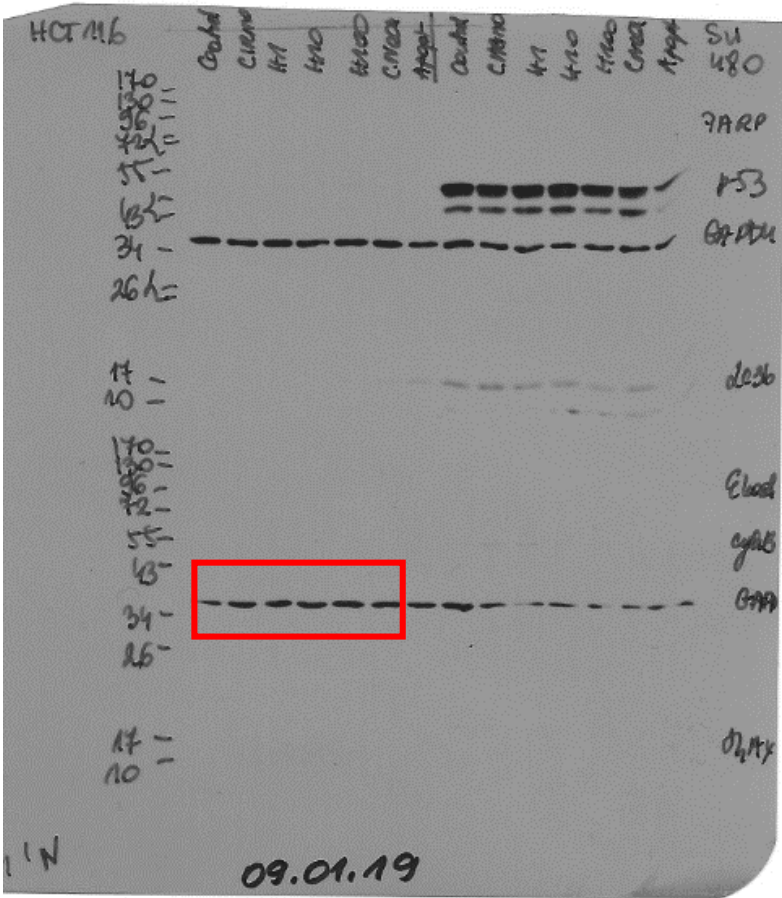

KM – Untreated Control  
KS – Irinotecan  
1 – Irinotecan + 1 uM Hemin  
10 – Irinotecan + 10 uM Hemin  
100 – Irinotecan + 100 uM Hemin  
NaOH – Irinotecan + NaOH

Fig. A.II.5



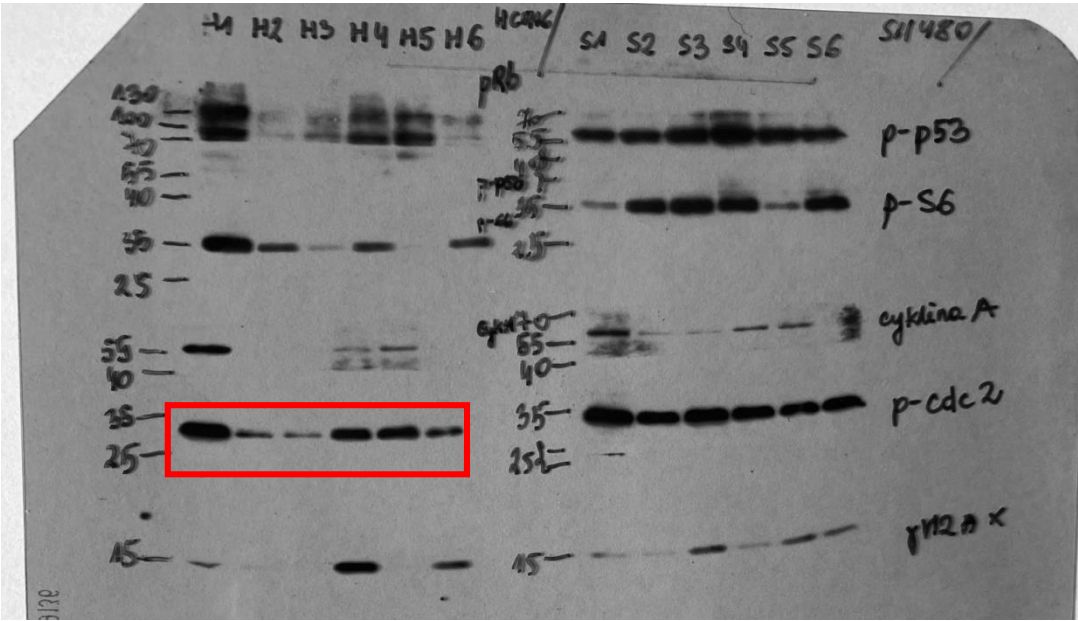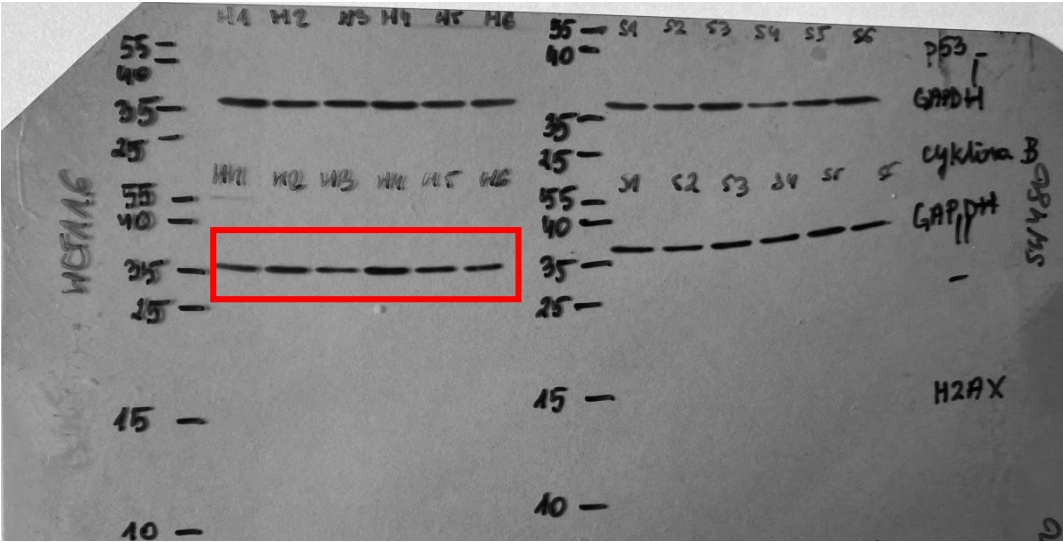

H1 – Untreated Control  
H2 – Irinotecan  
H3 – Irinotecan + 1 uM Hemin  
H4 – Irinotecan + 10 uM Hemin  
H5 – Irinotecan + 100 uM Hemin  
H6 – Irinotecan + NaOH

Fig. A.II.6

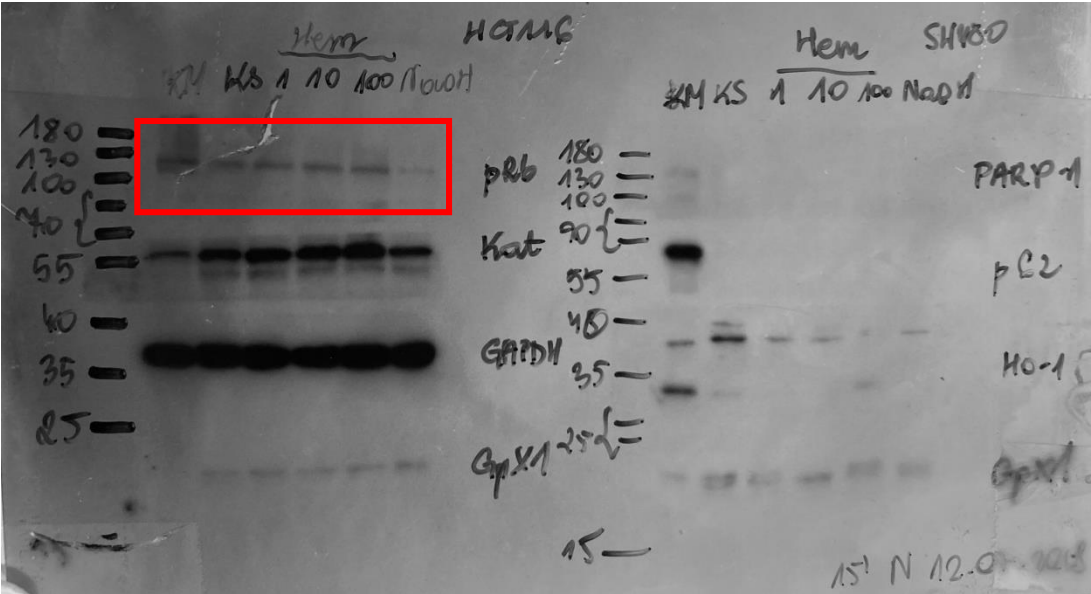

KM – Untreated Control  
KS – Irinotecan  
1 – Irinotecan + 1 uM Hemin  
10 – Irinotecan + 10 uM Hemin  
100 – Irinotecan + 100 uM Hemin  
NaOH – Irinotecan + NaOH

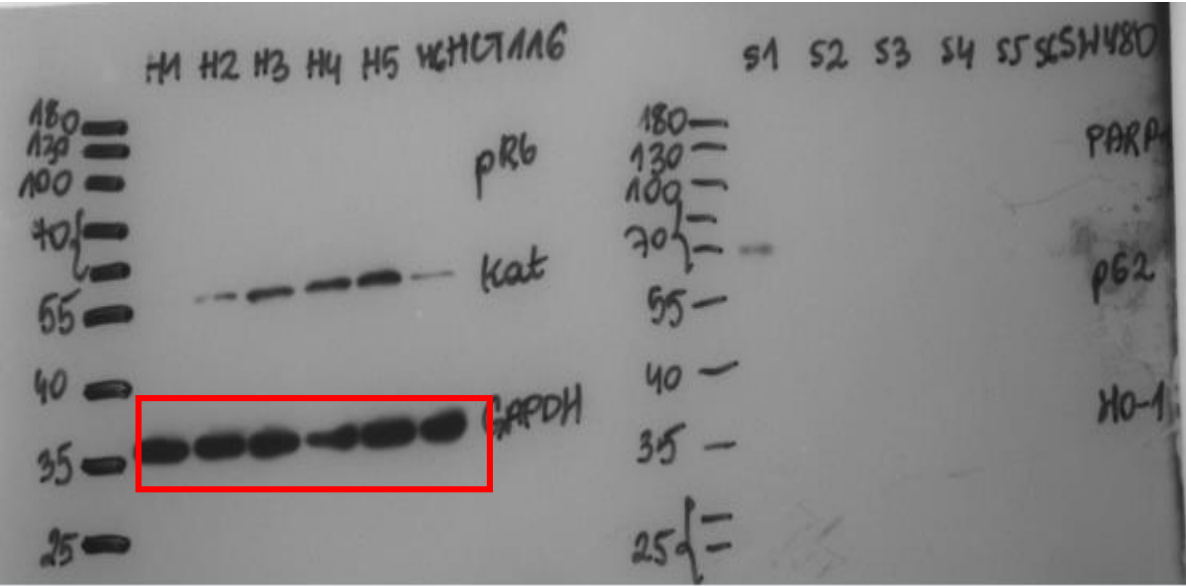

H1 – Untreated Control  
H2 – Irinotecan  
H3 – Irinotecan + 1 uM Hemin  
H4 – Irinotecan + 10 uM Hemin  
H5 – Irinotecan + 100 uM Hemin  
H6 – Irinotecan + NaOH

Fig. A.II.7



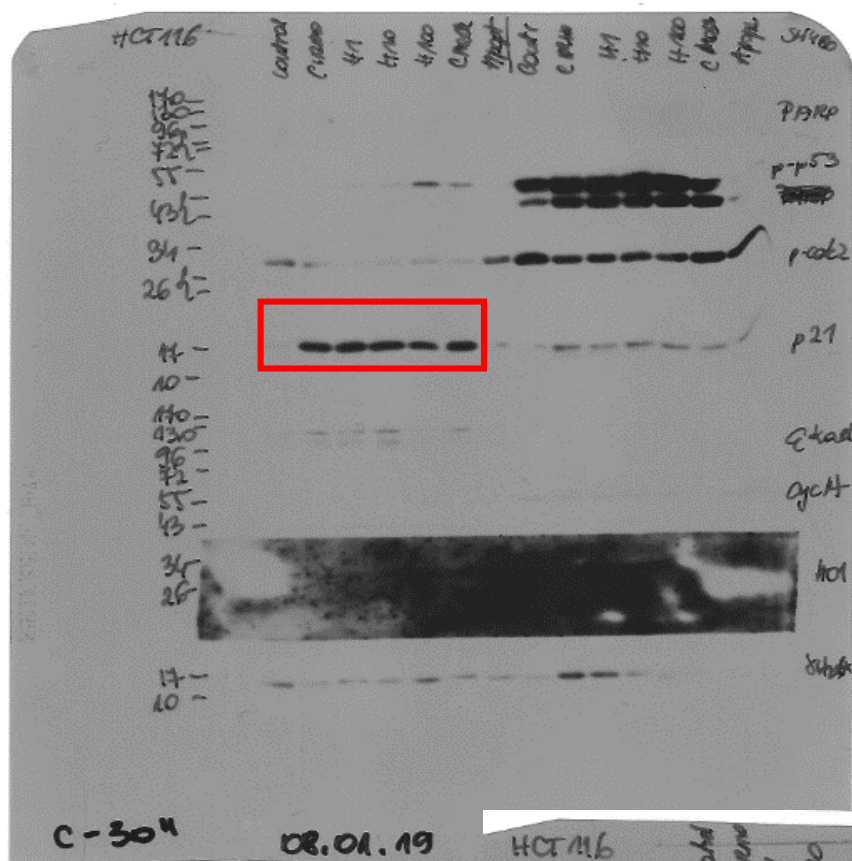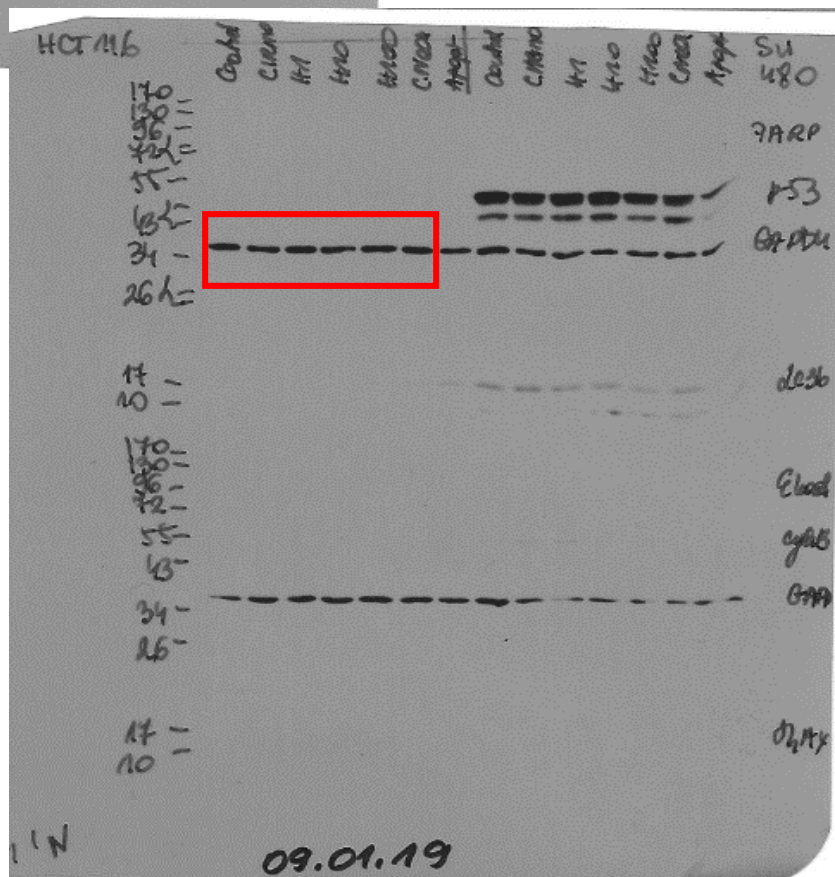

control – Untreated Control  
 C IRINO – Irinotecan  
 H1 – Irinotecan + 1 uM Hemin  
 H10 – Irinotecan + 10 uM Hemin  
 H100 – Irinotecan + 100 uM Hemin  
 NaOH – Irinotecan + NaOH

Fig. A.II.8

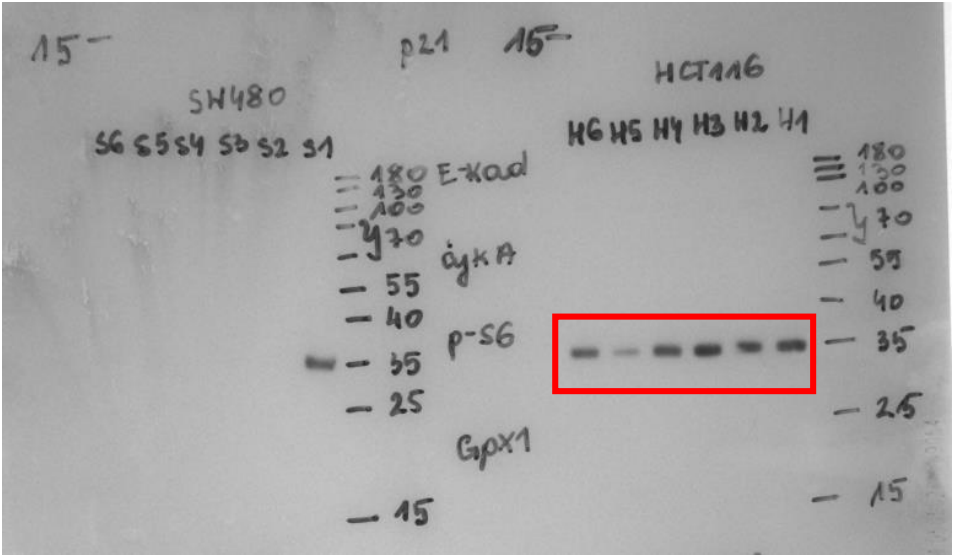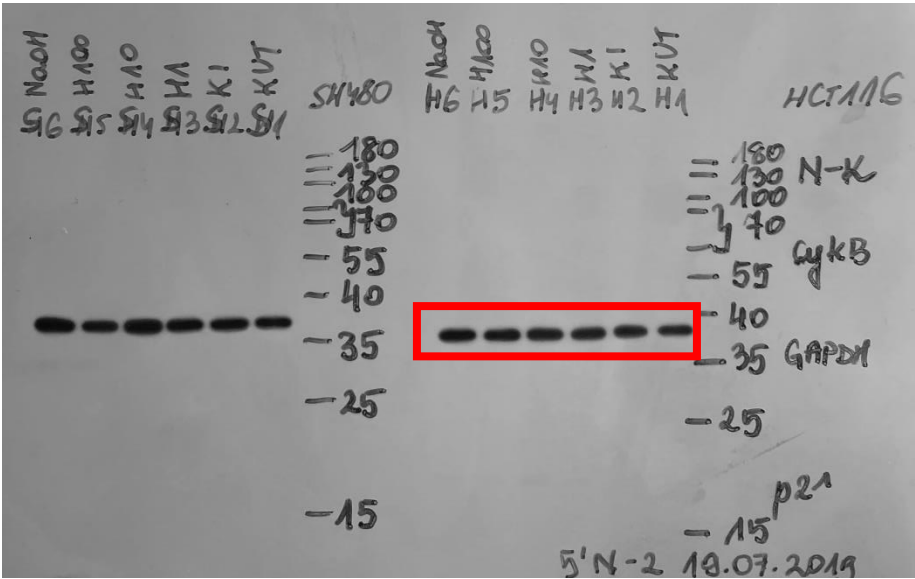

- H1 – Untreated Control
- H2 – Irinotecan
- H3 – Irinotecan + 1 uM Hemin
- H4 – Irinotecan + 10 uM Hemin
- H5 – Irinotecan + 100 uM Hemin
- H6 – Irinotecan + NaOH

Fig. A.II.9

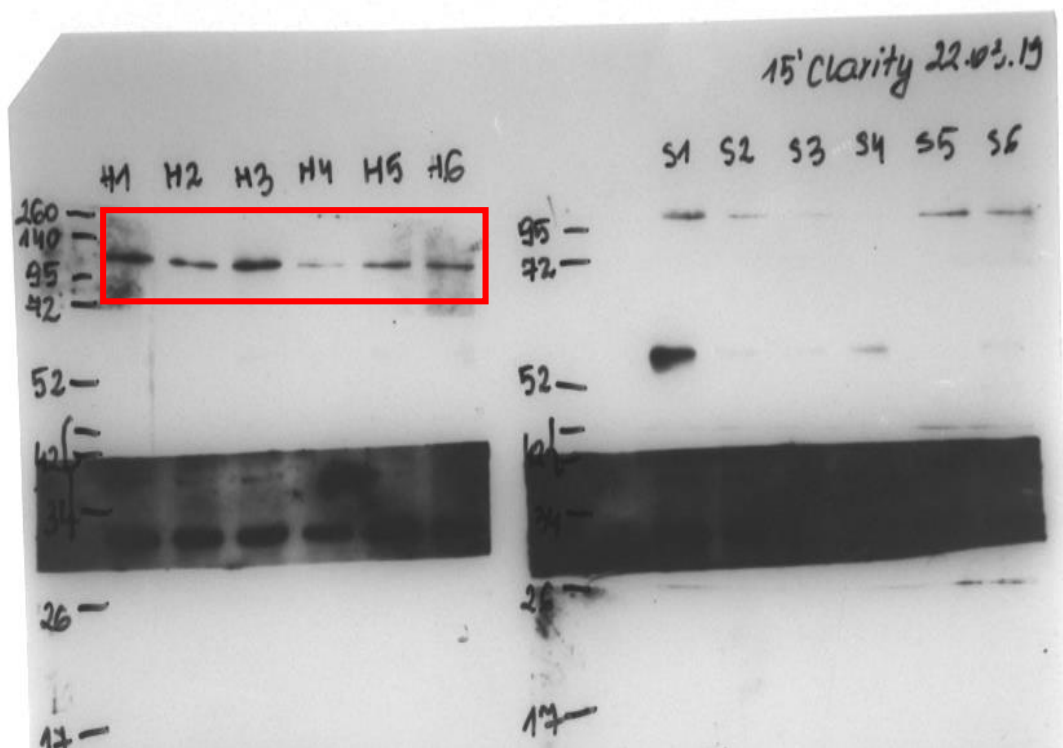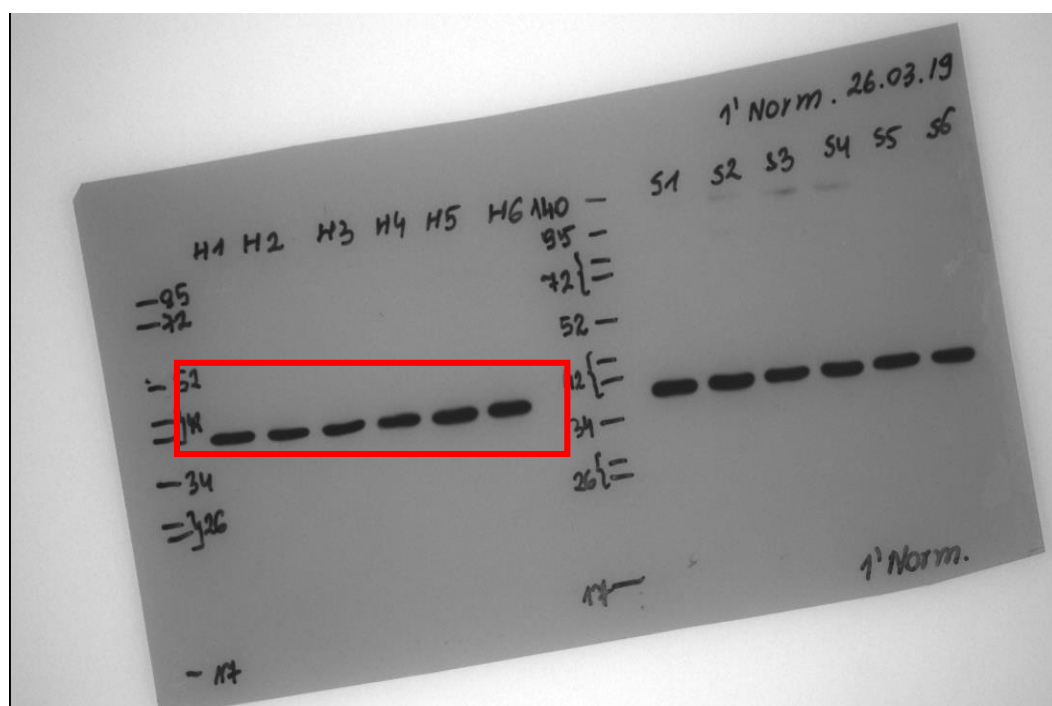

H1 – Untreated Control  
H2 – Irinotecan  
H3 – Irinotecan + 1  $\mu$ M Hemin  
H4 – Irinotecan + 10  $\mu$ M Hemin  
H5 – Irinotecan + 100  $\mu$ M Hemin  
H6 – Irinotecan + NaOH

Fig. A.II.10

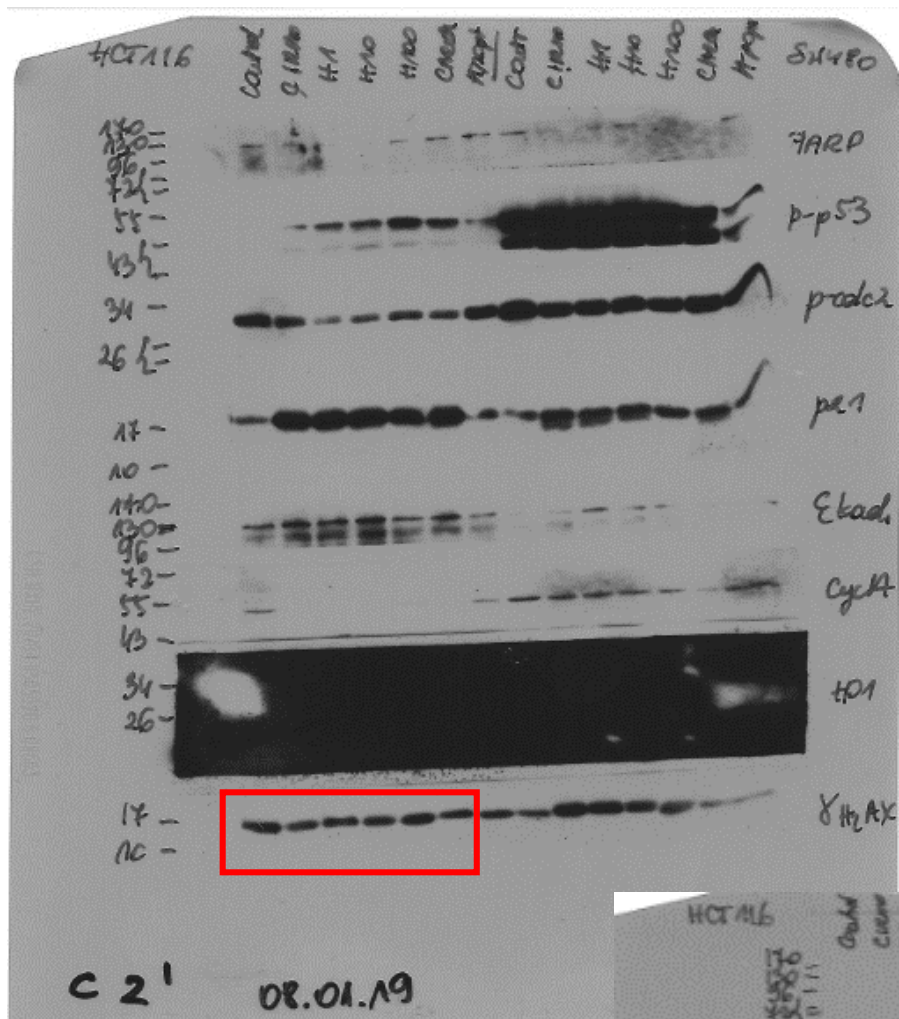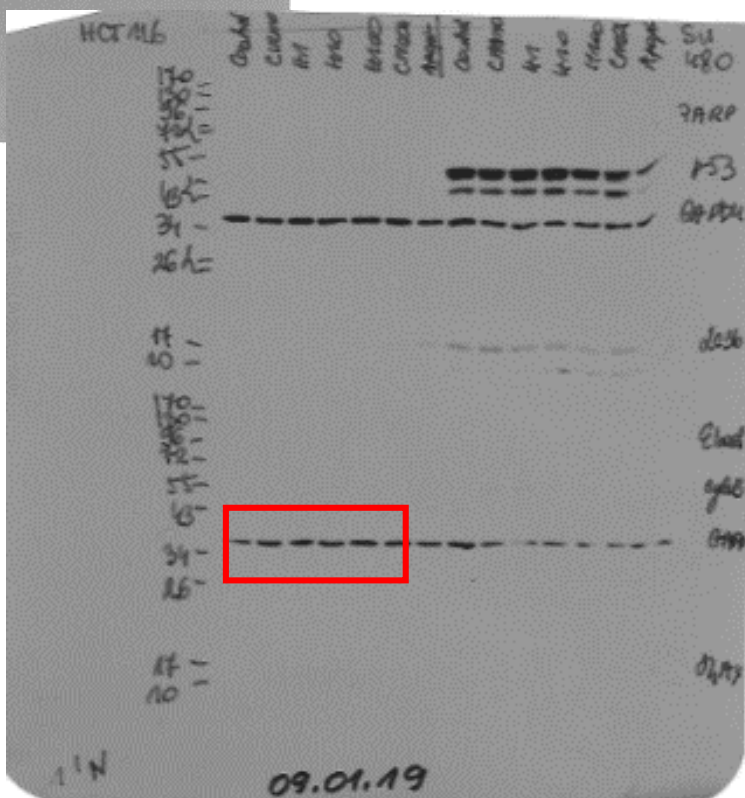

control – Untreated Control  
C IRINO – Irinotecan  
H1 – Irinotecan + 1 uM Hemin  
H10 – Irinotecan + 10 uM Hemin  
H100 – Irinotecan + 100 uM Hemin  
NaOH – Irinotecan + NaOH

Fig. A.II.11

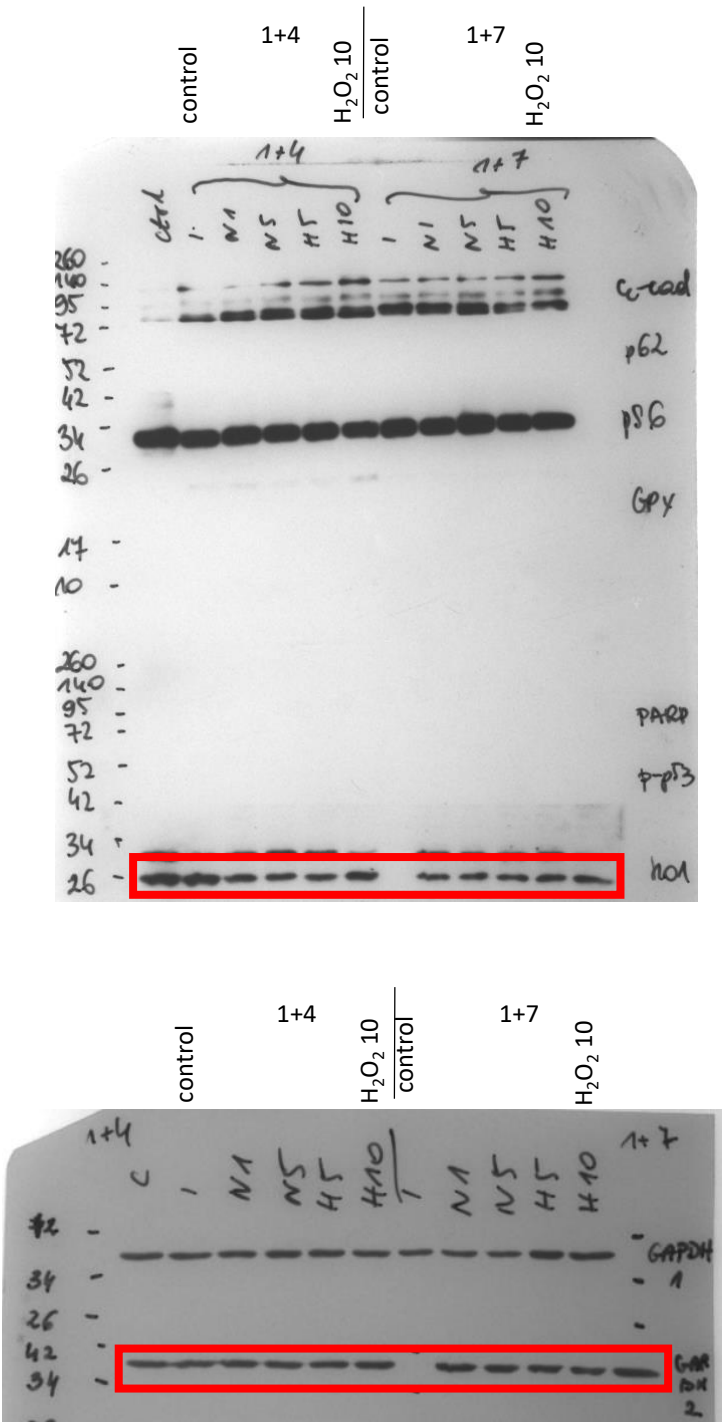

Fig. A.II.12



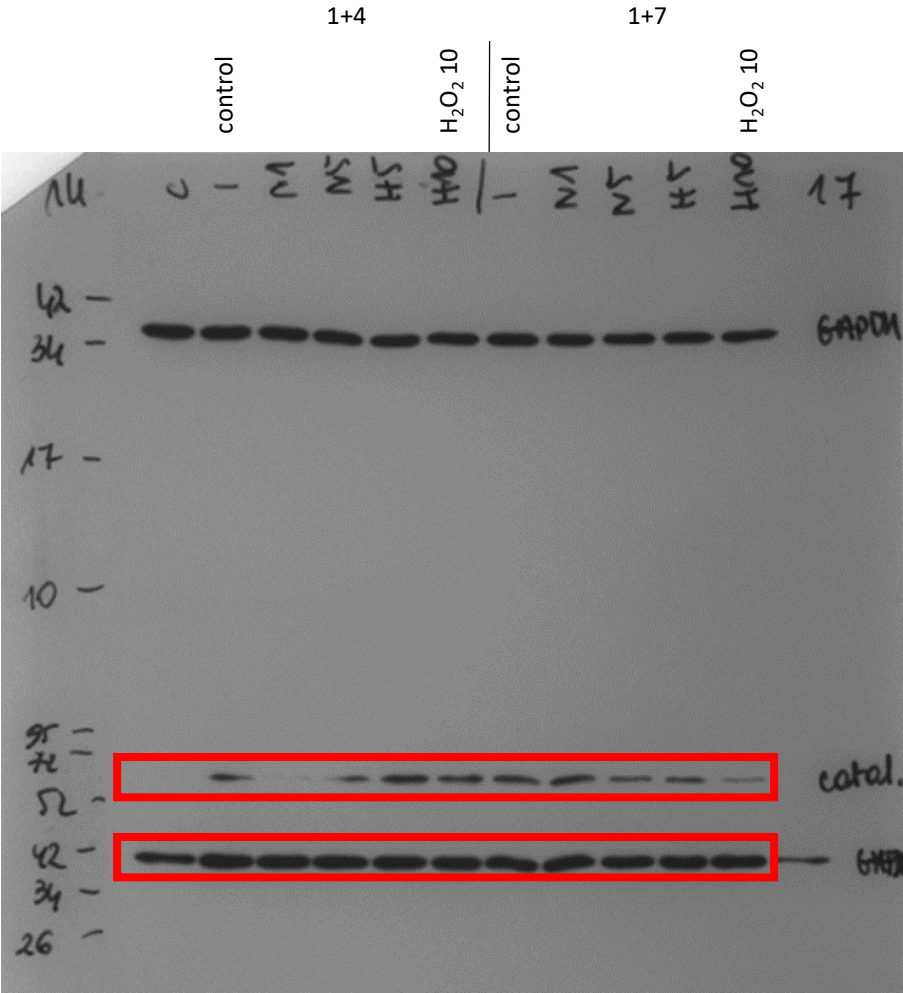

Fig. A.II.13



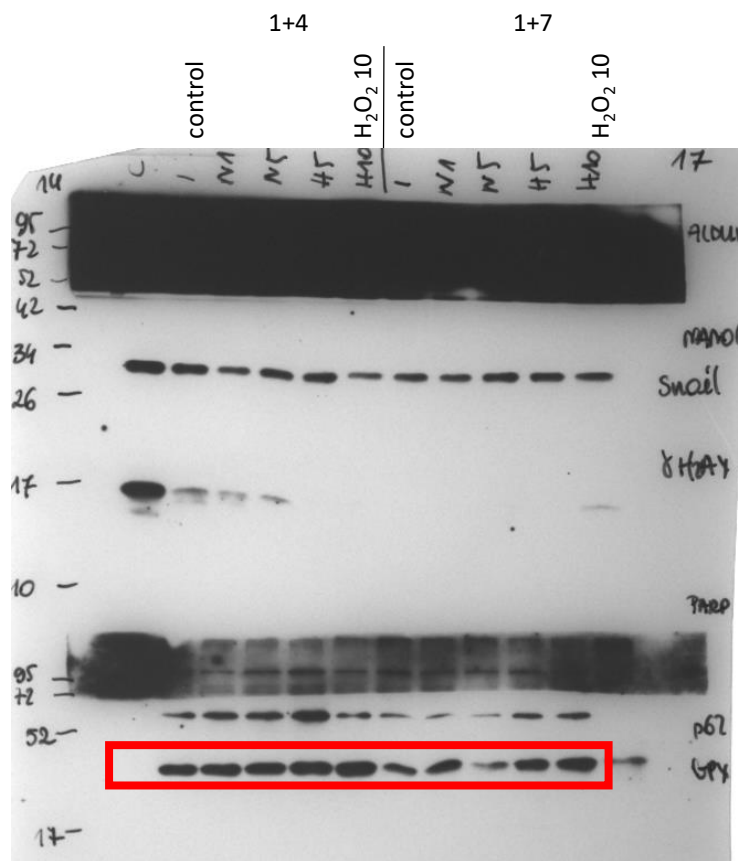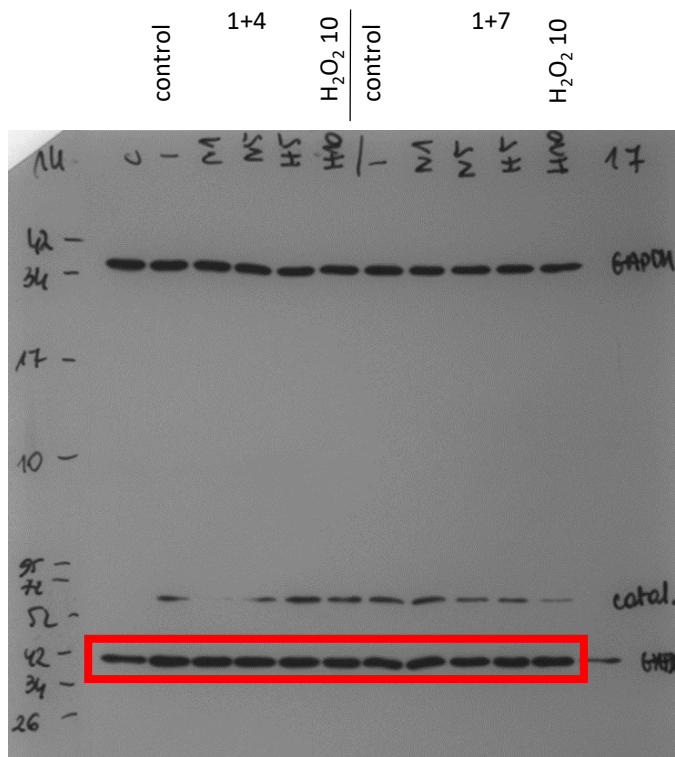

Fig. A.II.14

cyclin A

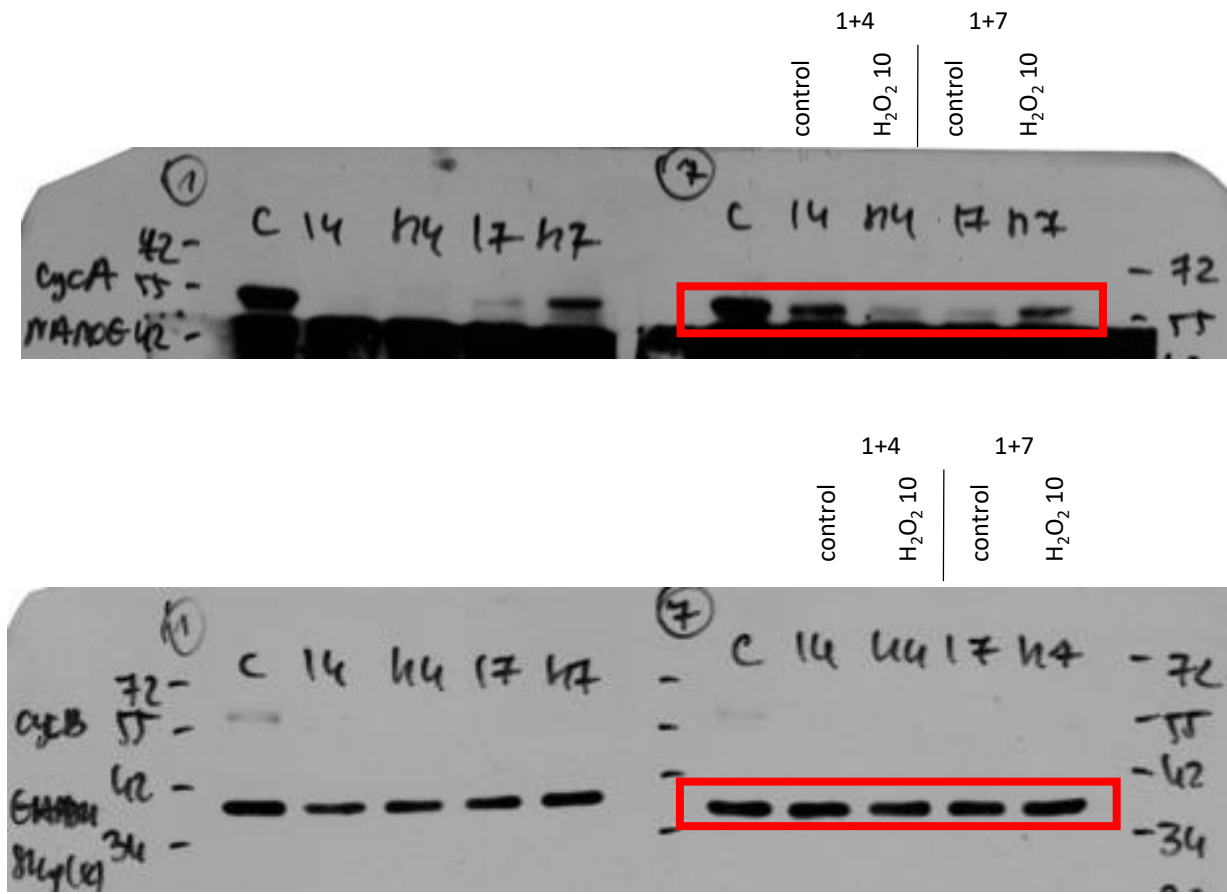

Fig. A.II.15

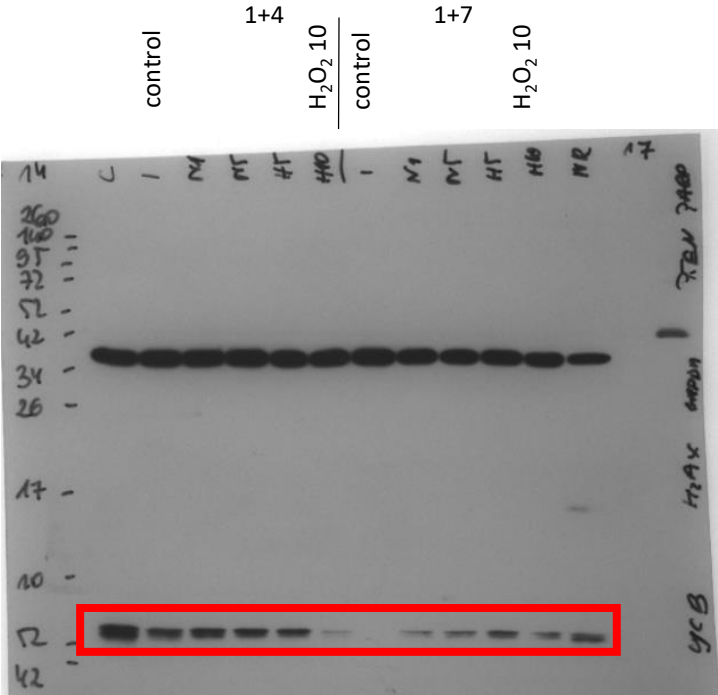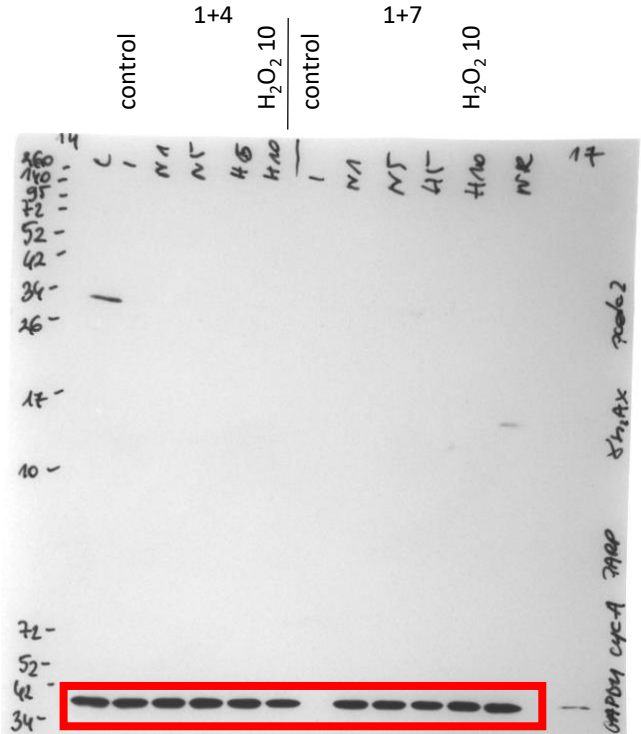

Fig. A.II.16

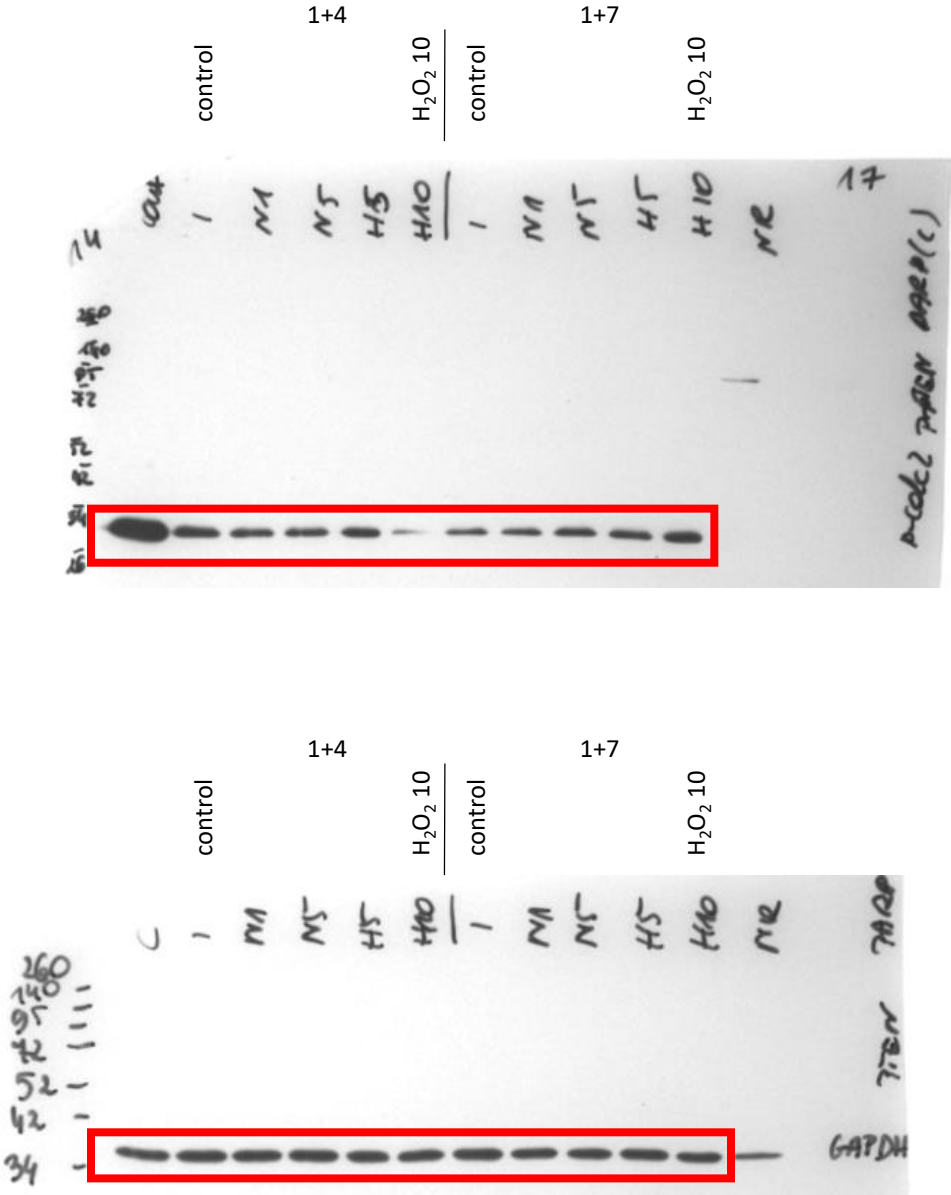

Fig. A.II.17

p-Rb

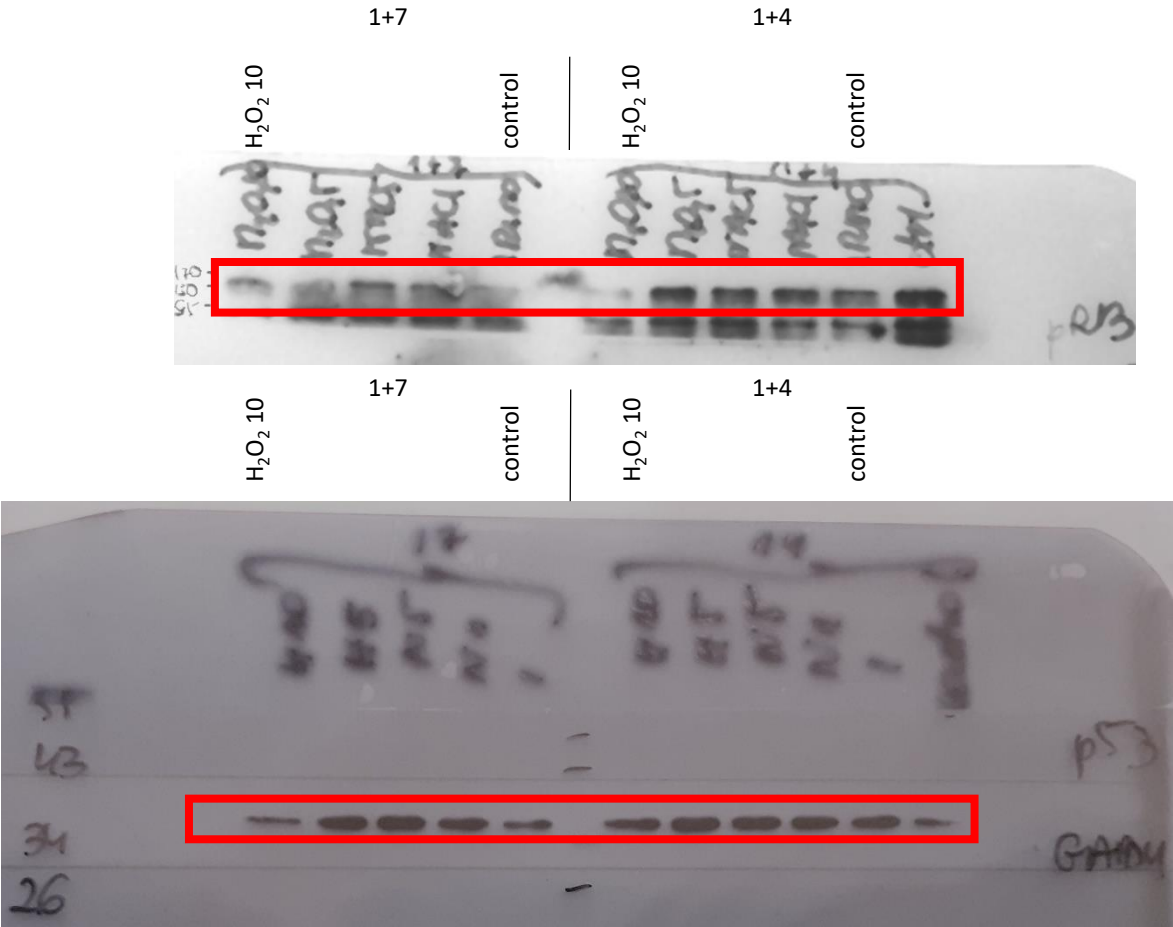

Fig. A.II.18

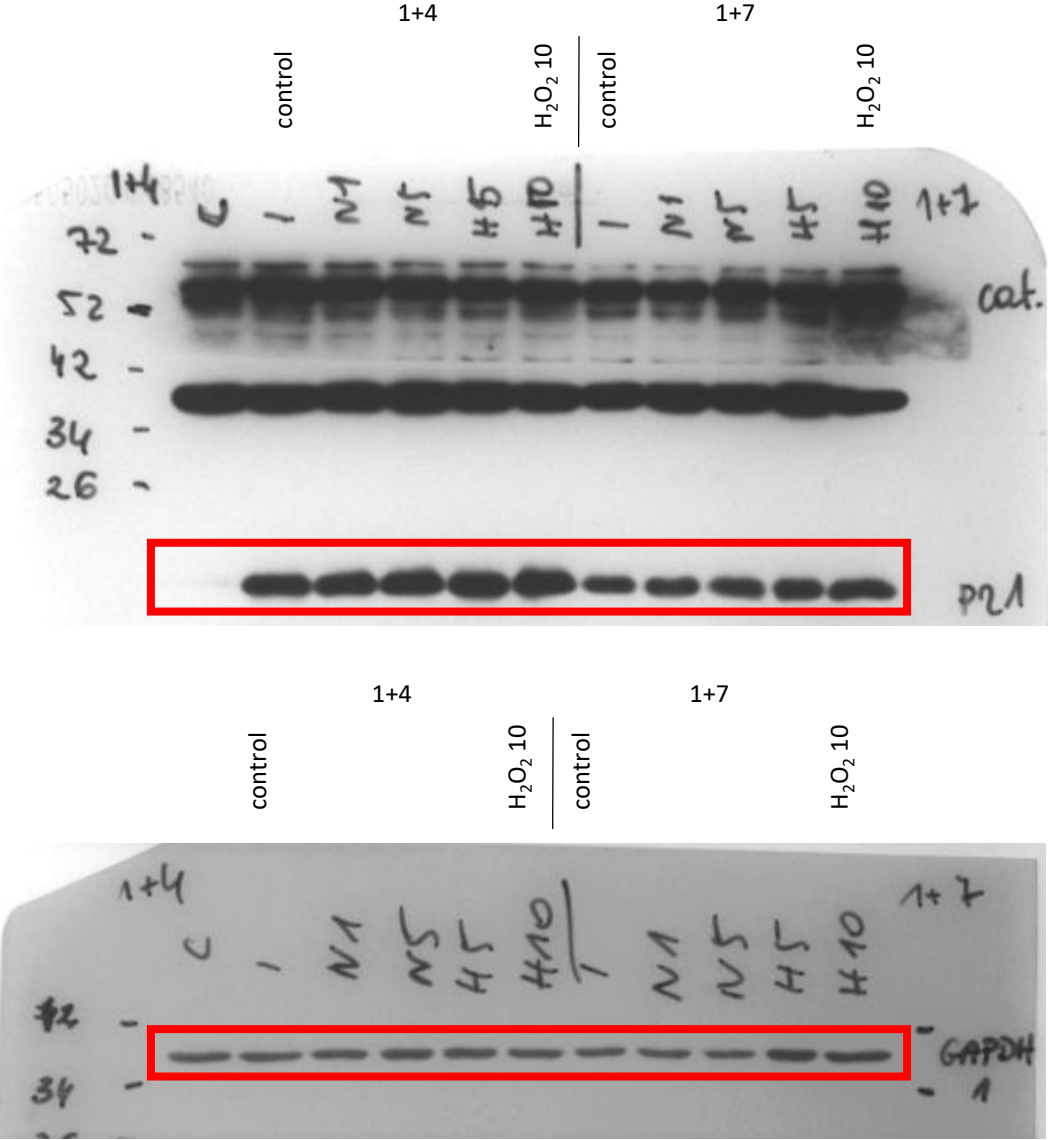

Fig. A.II.19



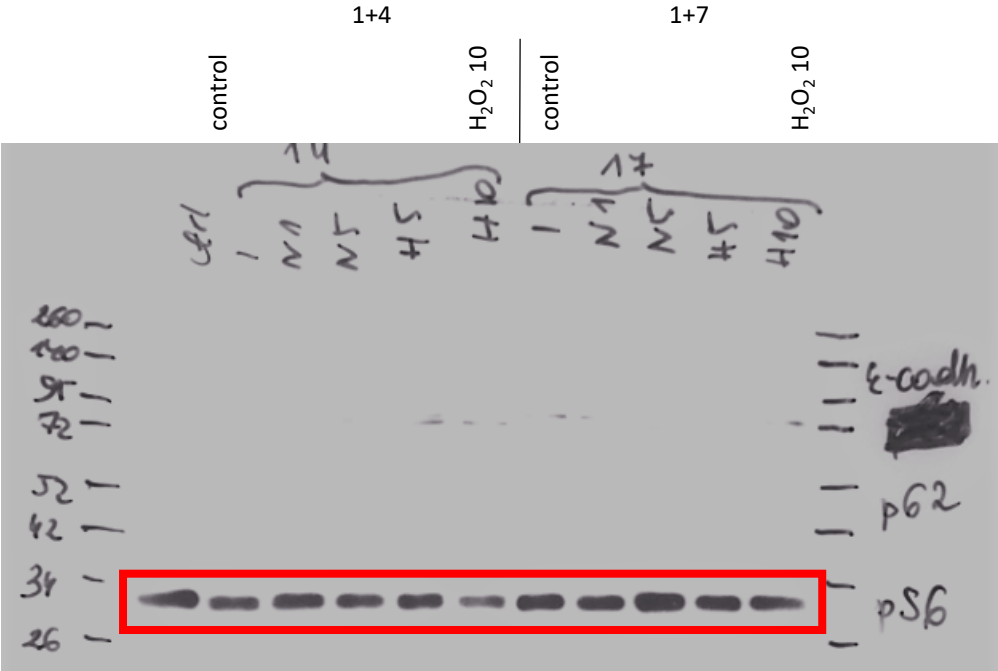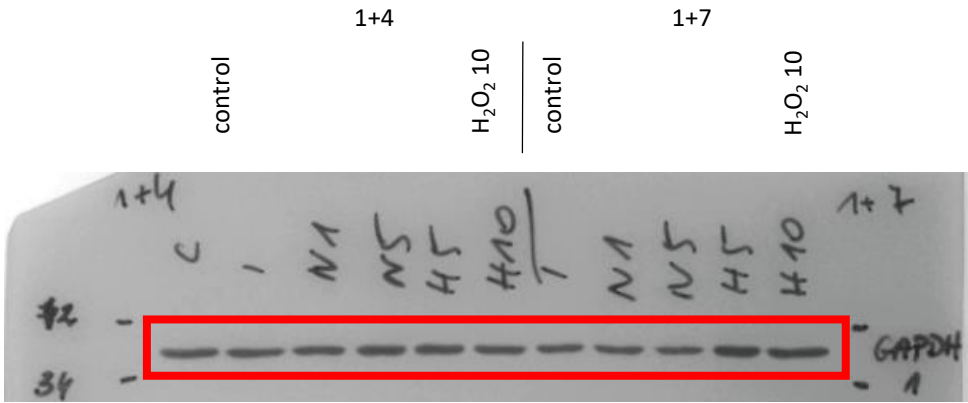

Fig. A.II.20

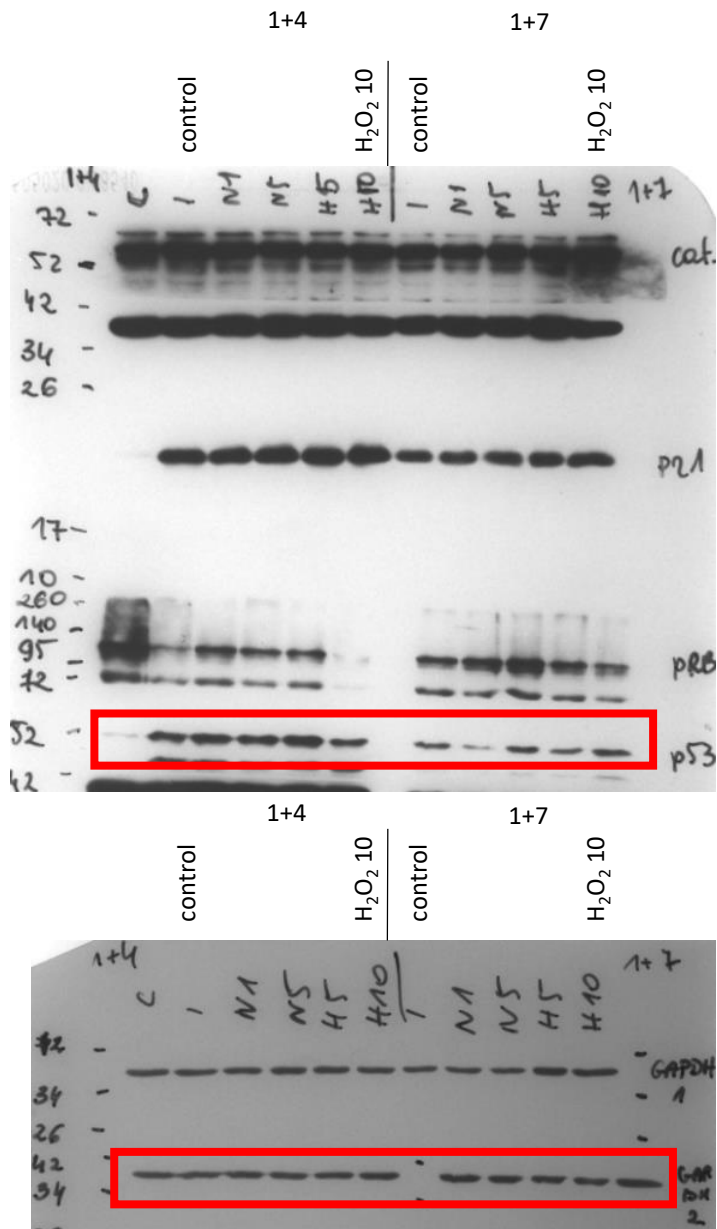

Fig. A.II.21

E-cadherin

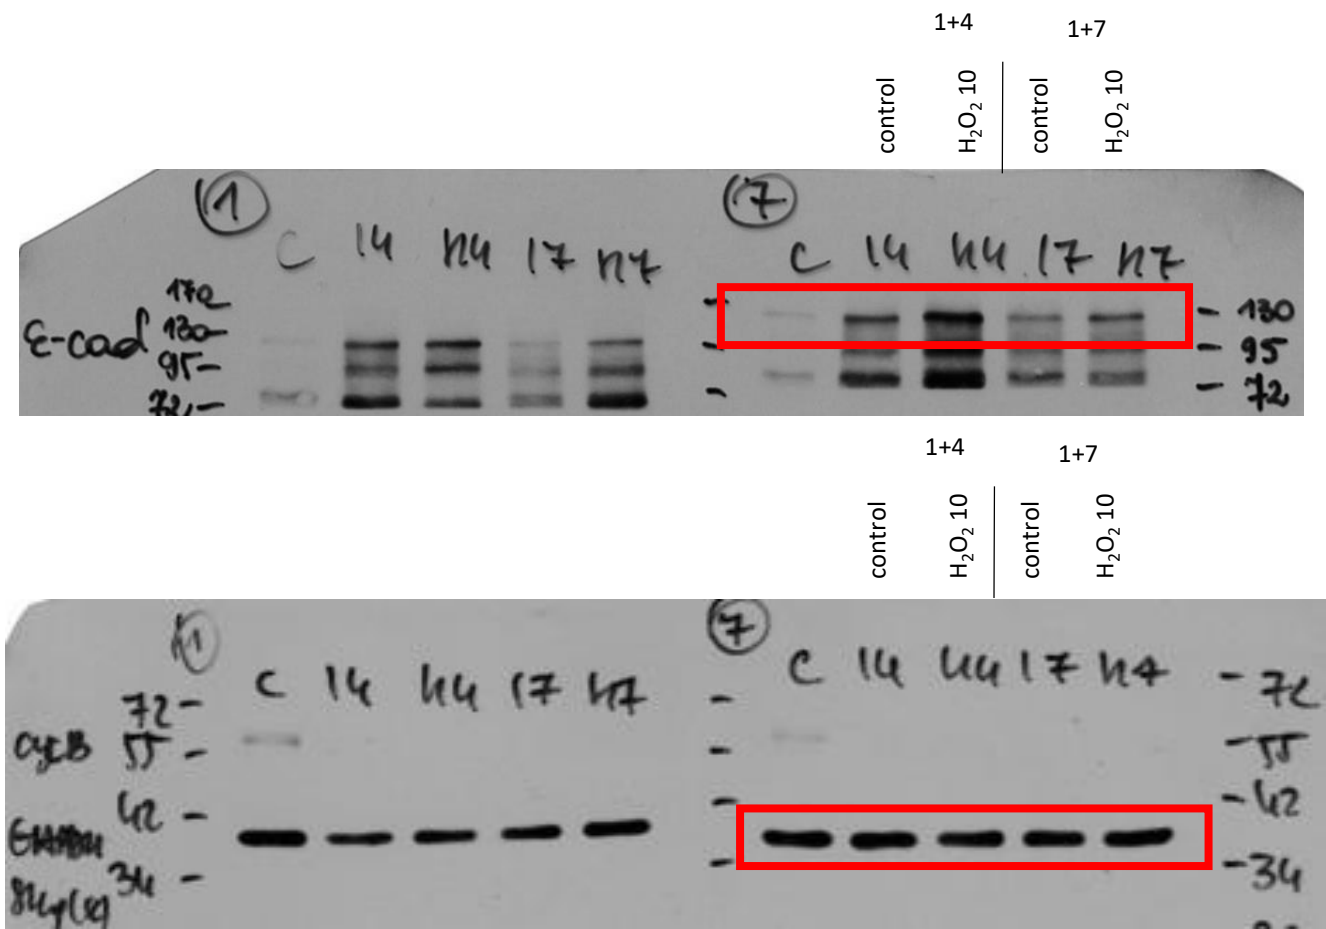

Fig. A.II.22

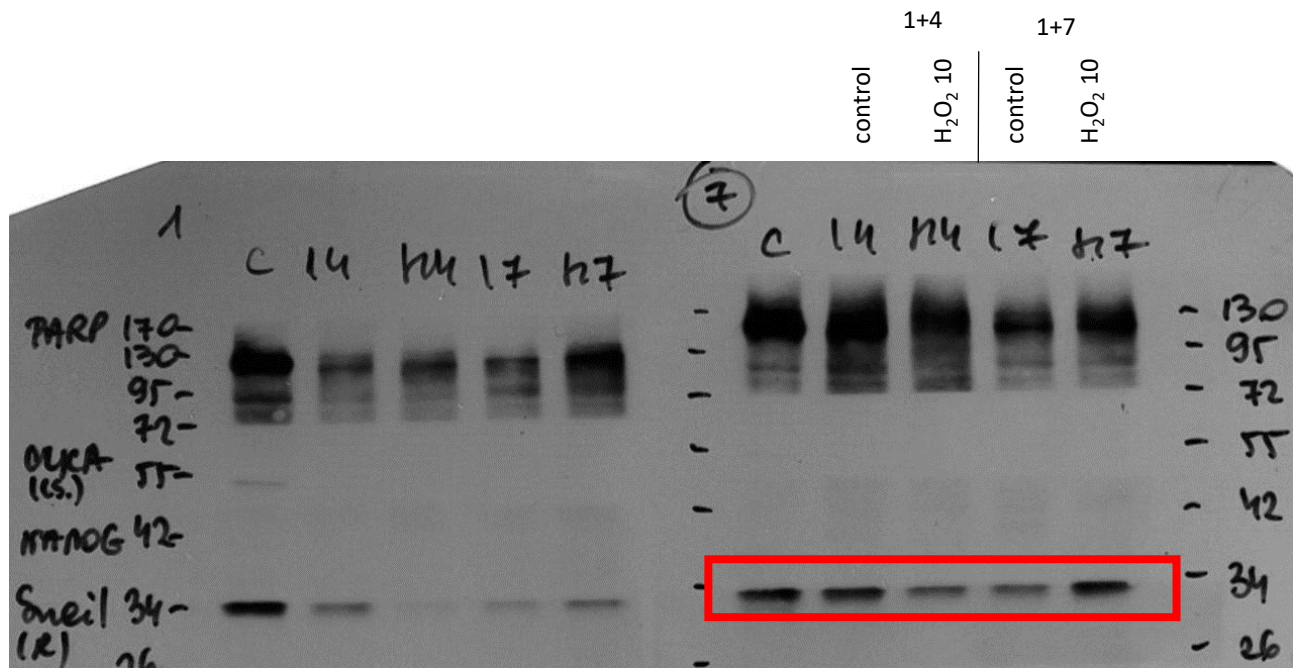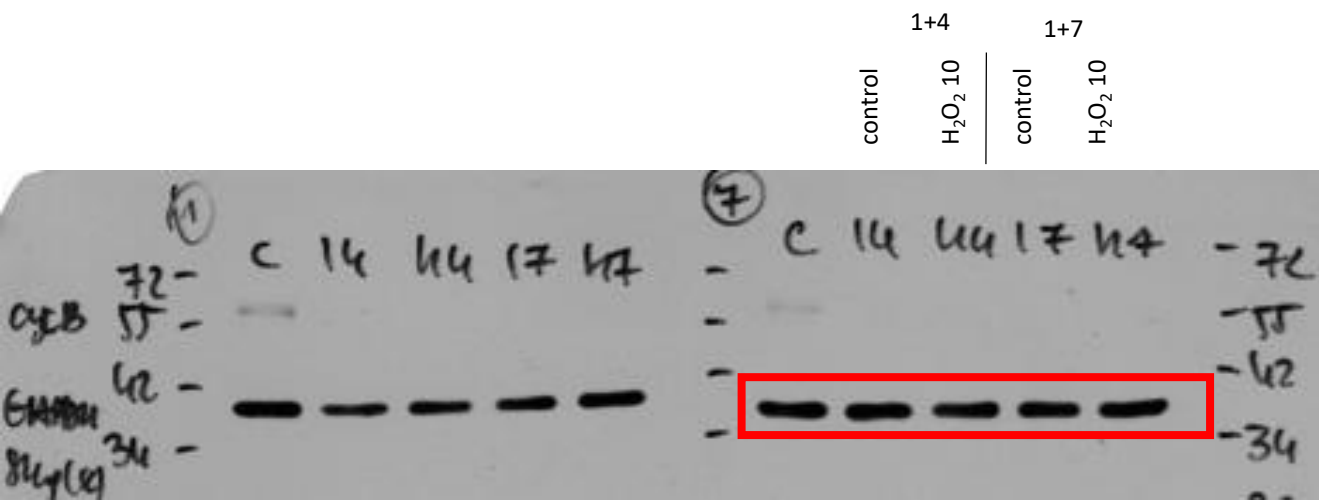

Fig. A.II.23

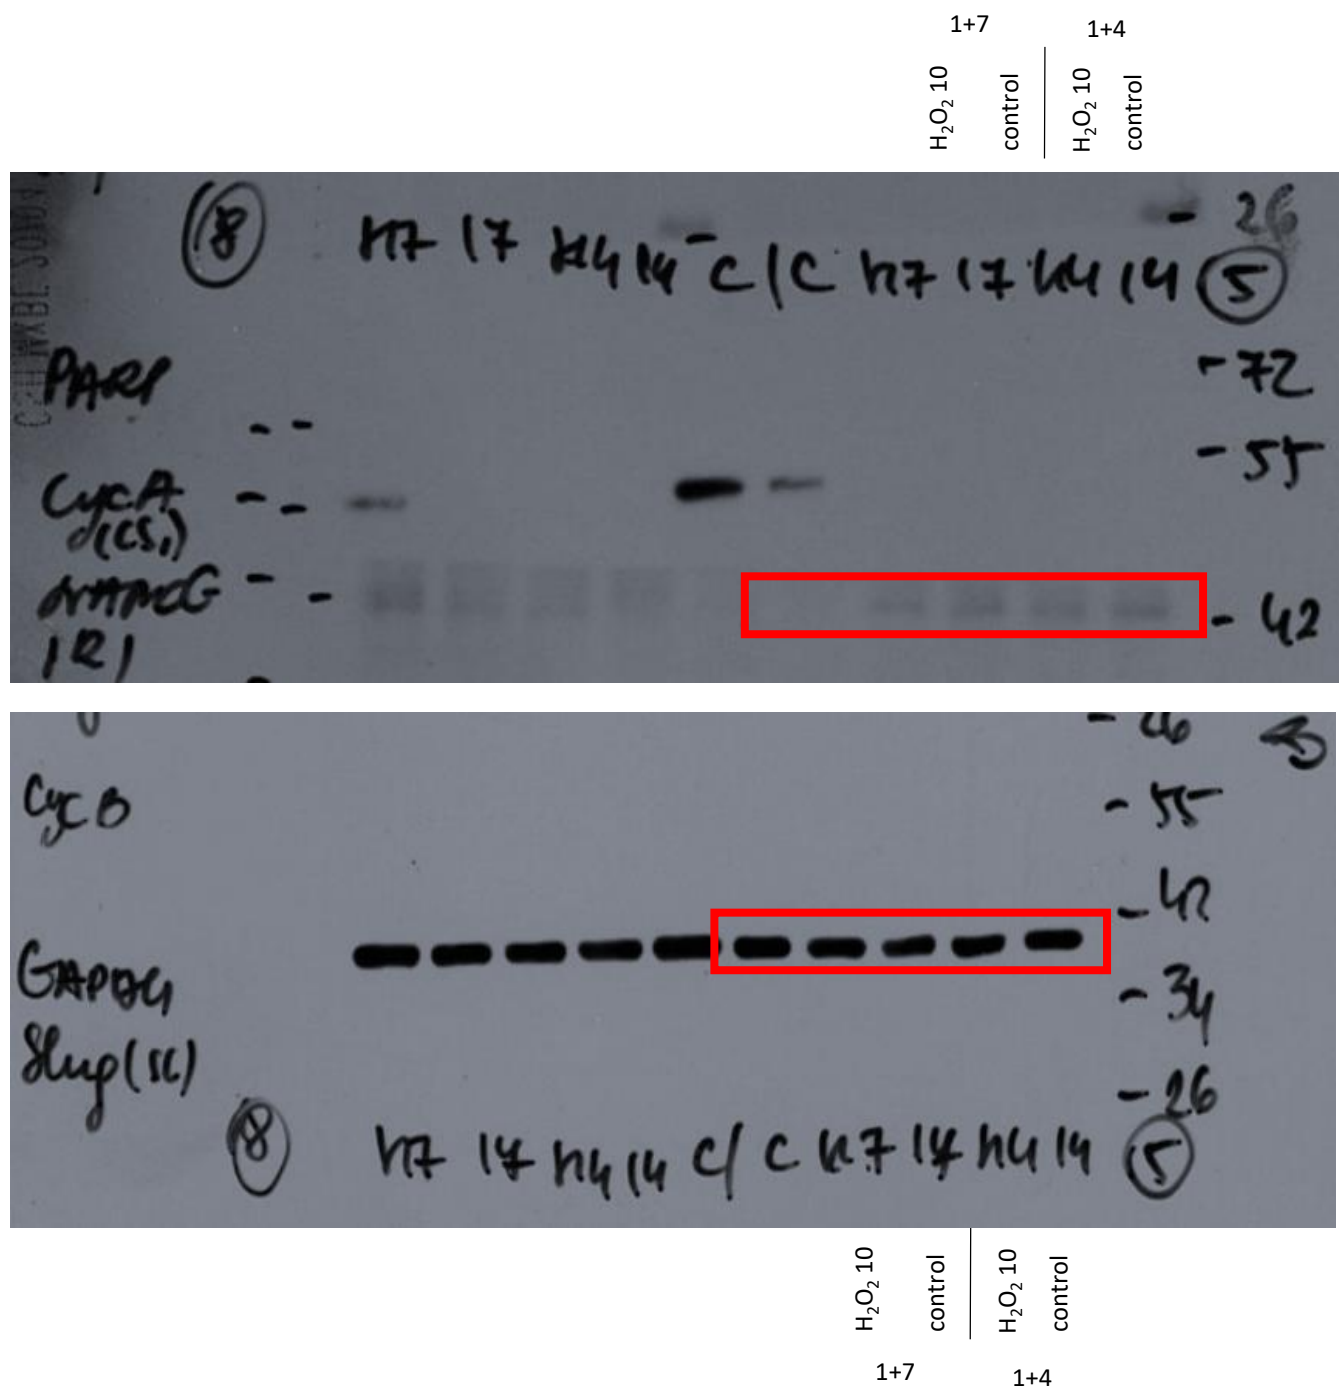

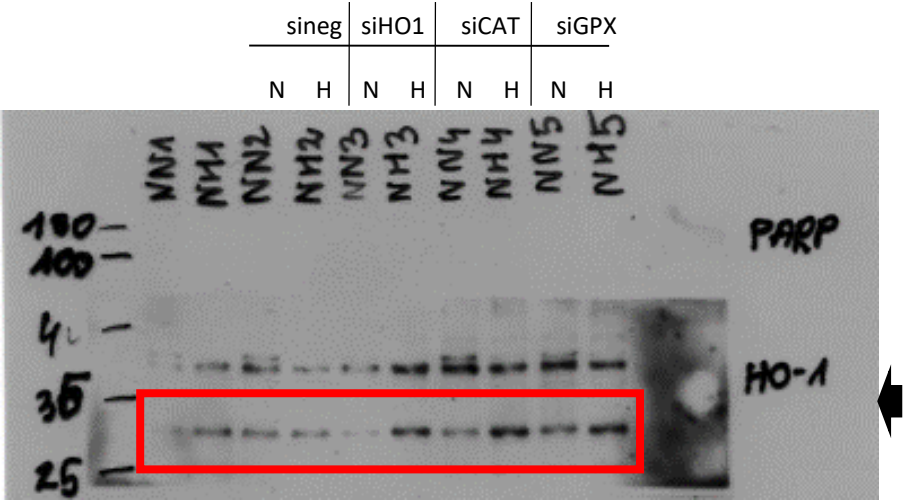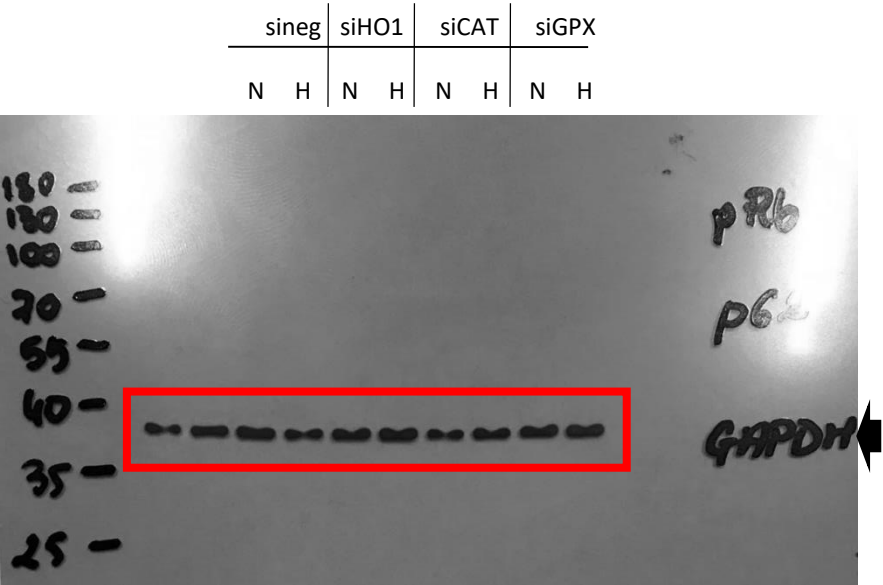

Fig. A.II.25



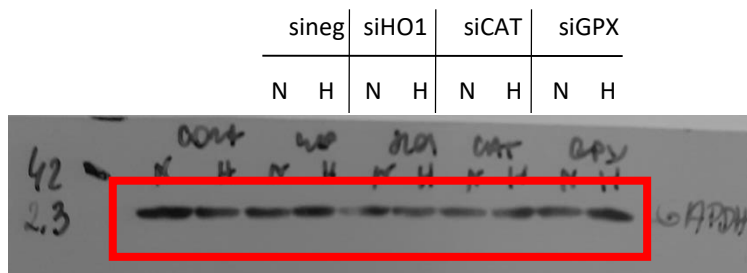

Fig. A.II.26

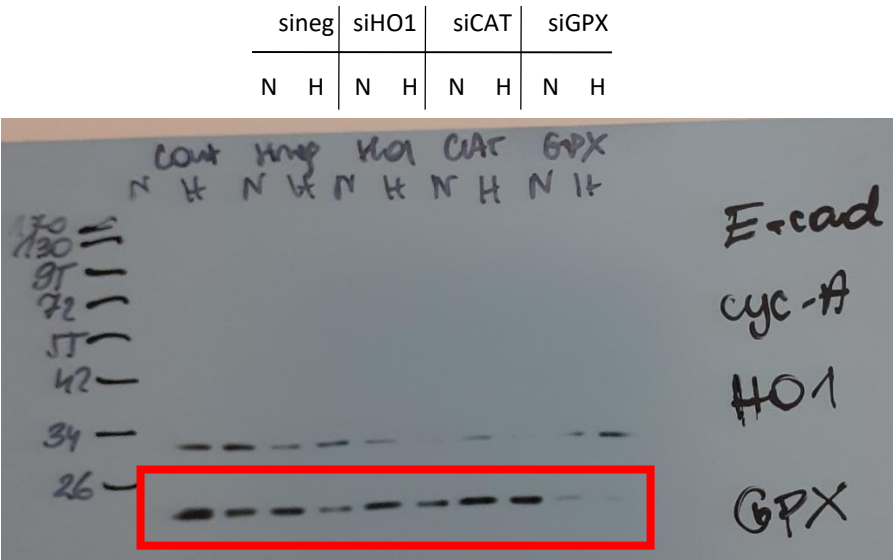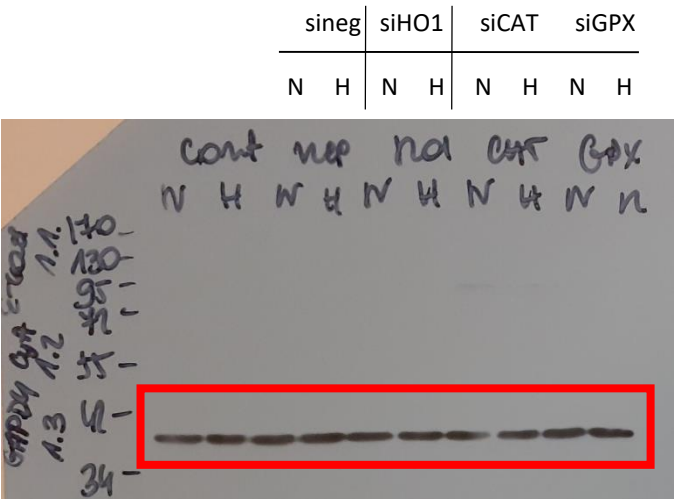

Fig. A.II.27

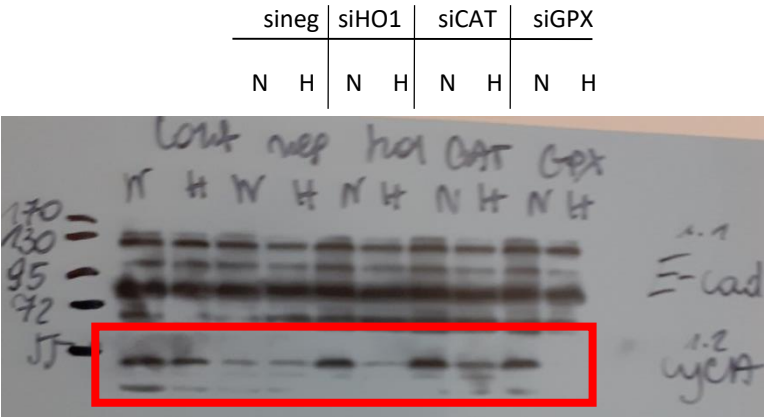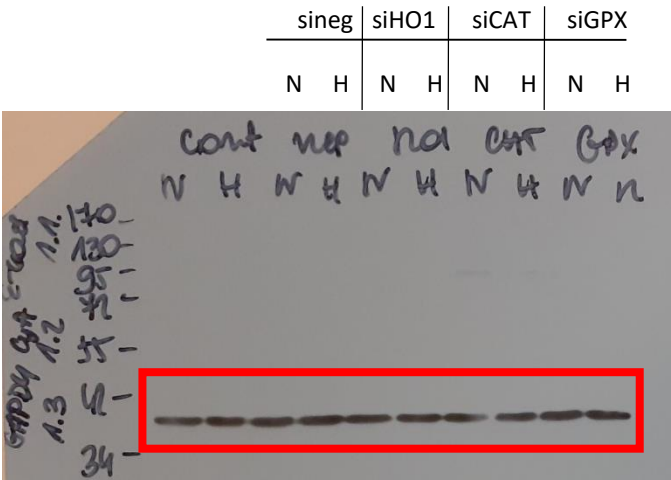

Fig. A.II.28

cyclin B

| sineg |   | siHO1 |   | siCAT |   | siGPX |   |
|-------|---|-------|---|-------|---|-------|---|
| N     | H | N     | H | N     | H | N     | H |

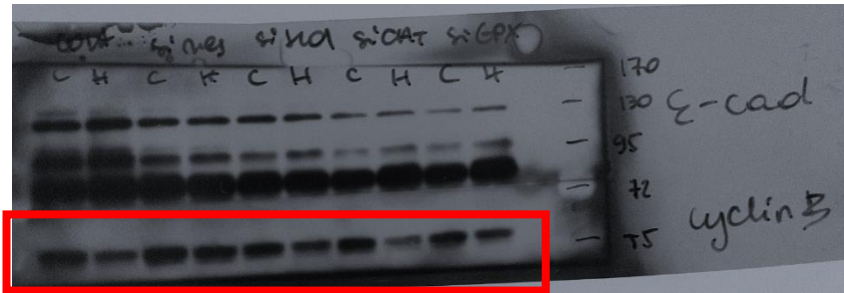

| sineg |   | siHO1 |   | siCAT |   | siGPX |   |
|-------|---|-------|---|-------|---|-------|---|
| N     | H | N     | H | N     | H | N     | H |

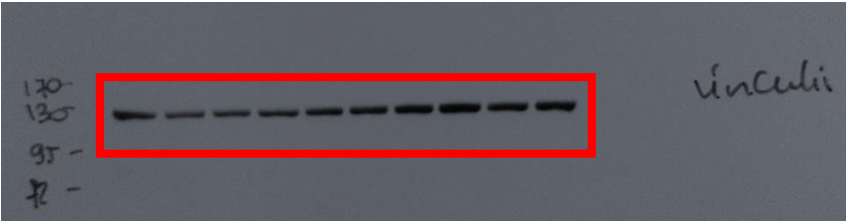

Fig. A.II.29

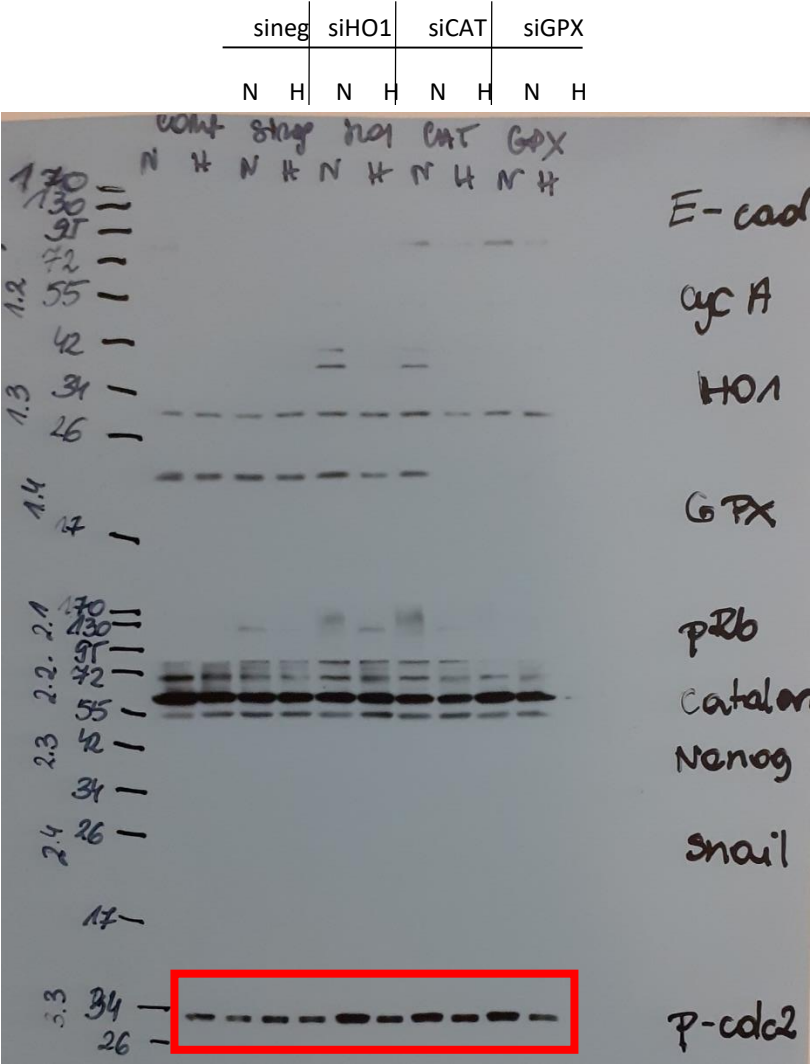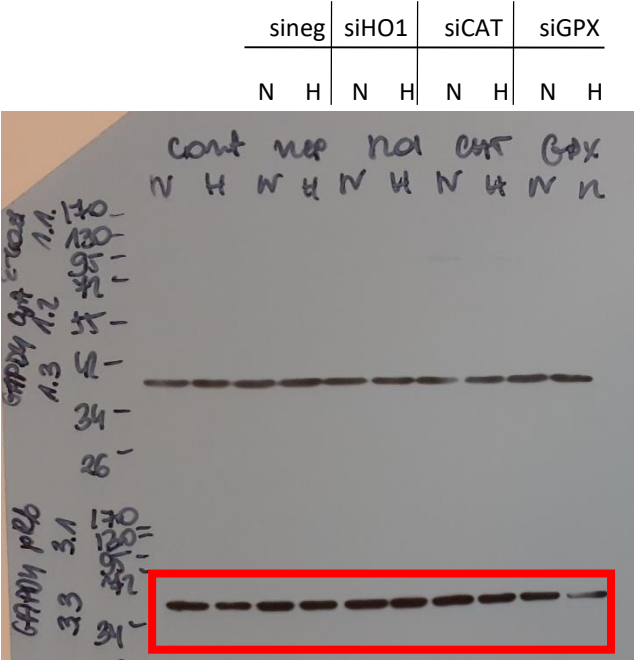

Fig. A.II.30

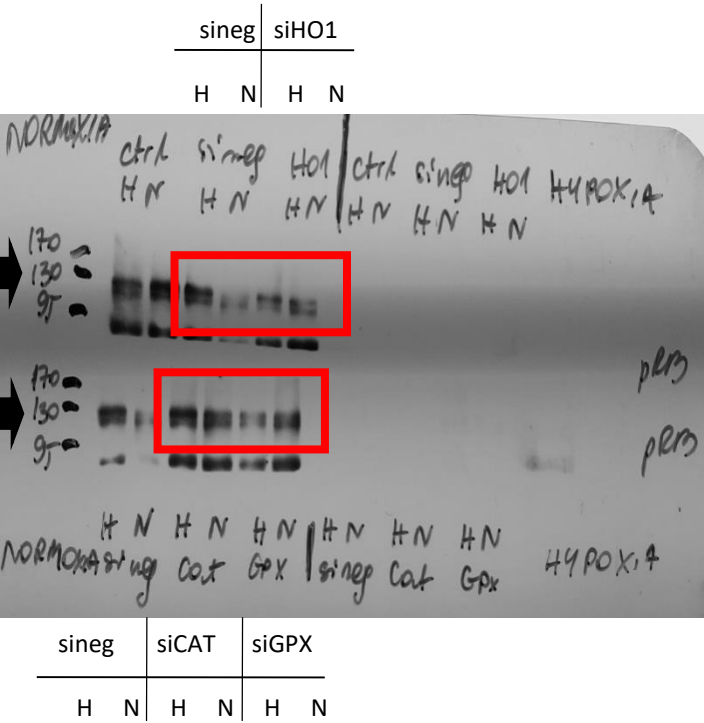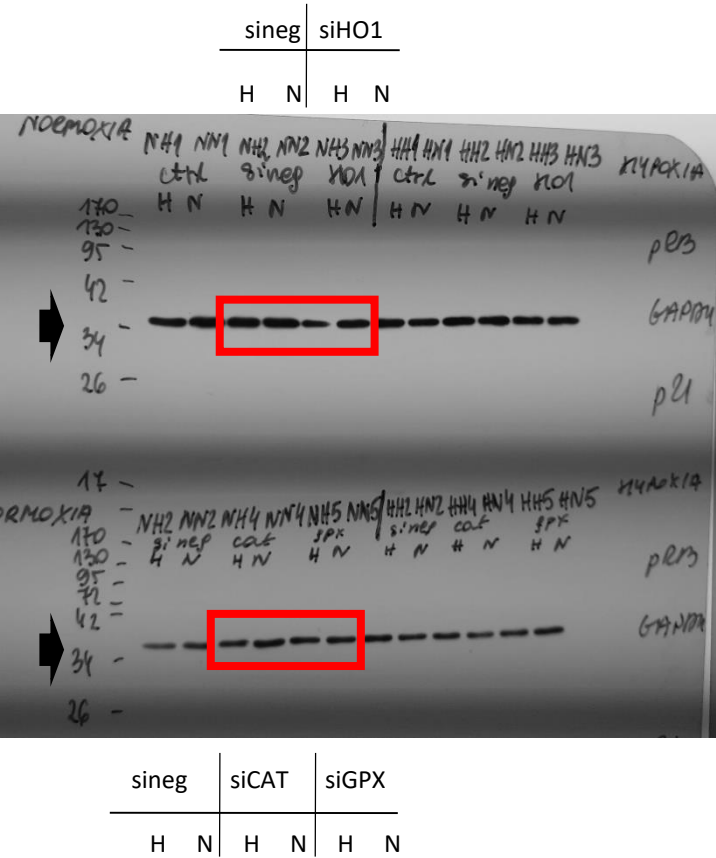

Fig. A.II.31



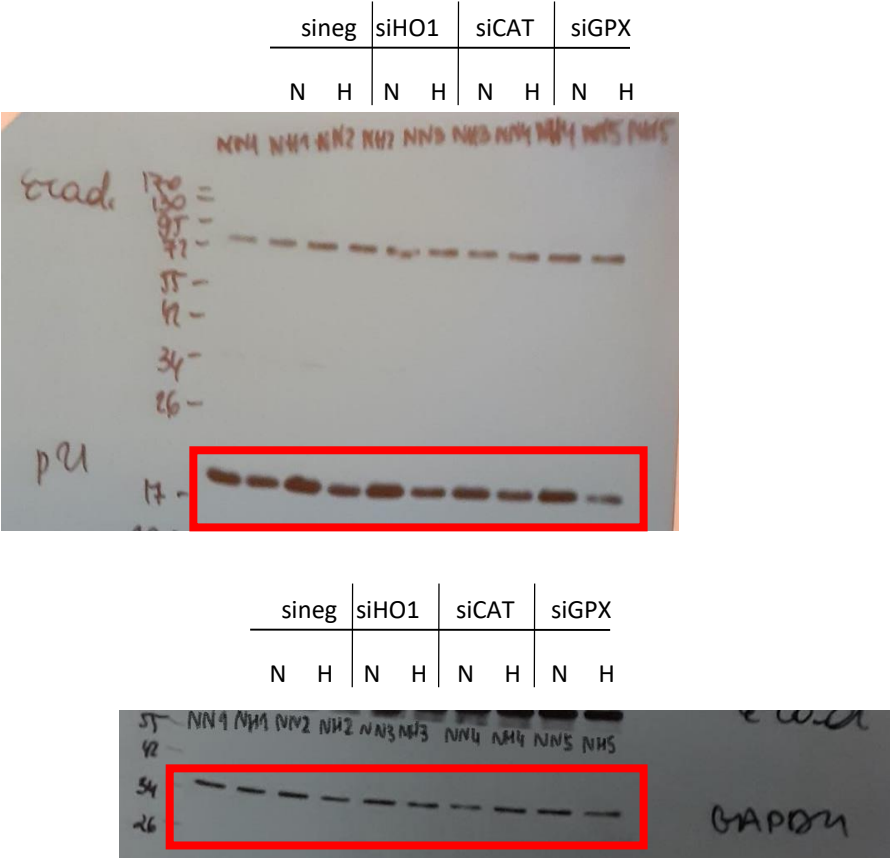

Fig. A.II.32

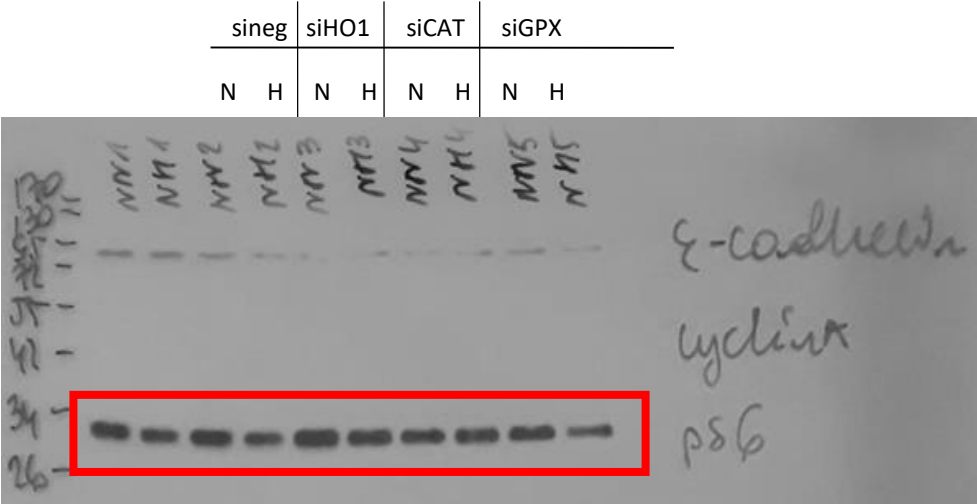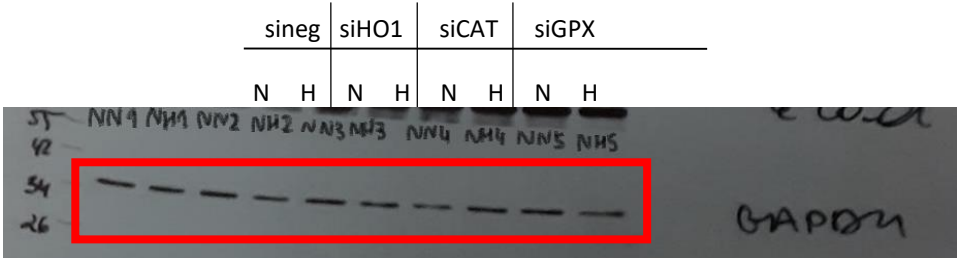

Fig. A.II.33

PARP-1

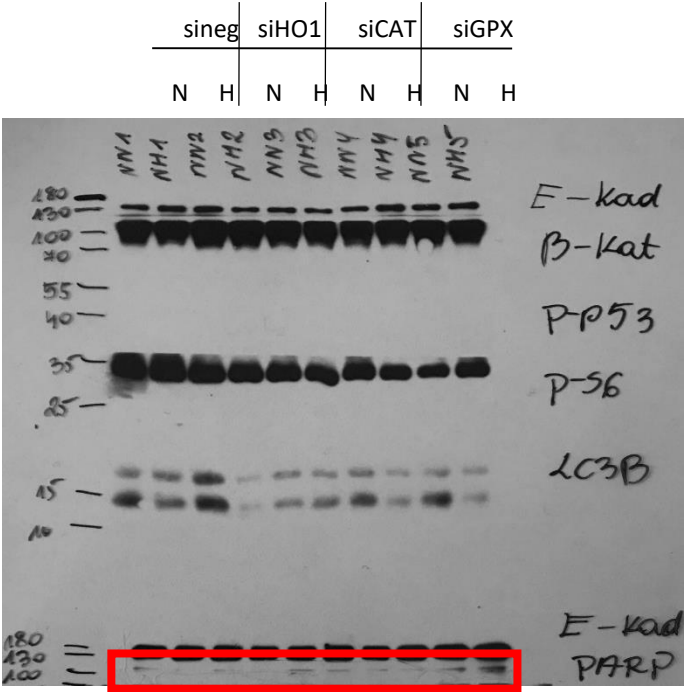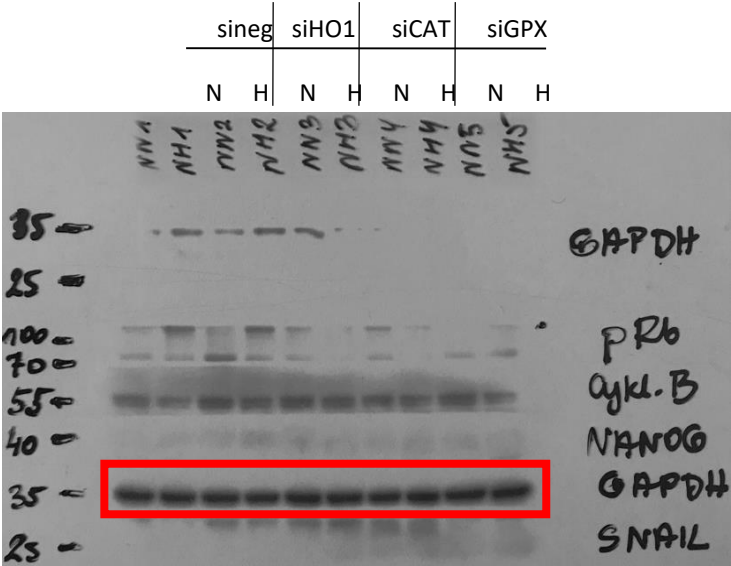

Fig. A.II.34

E-cadherin

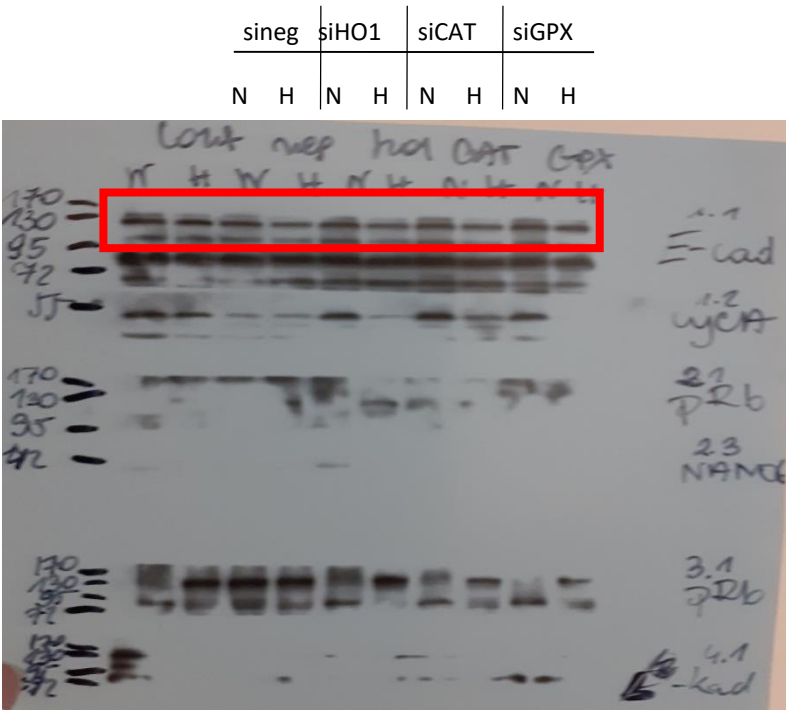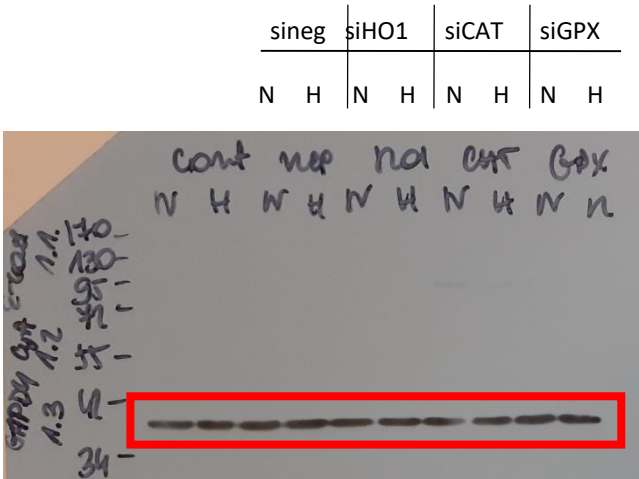

Fig. A.II.35

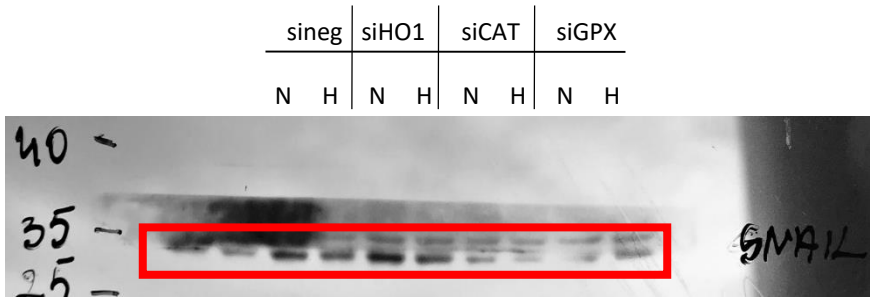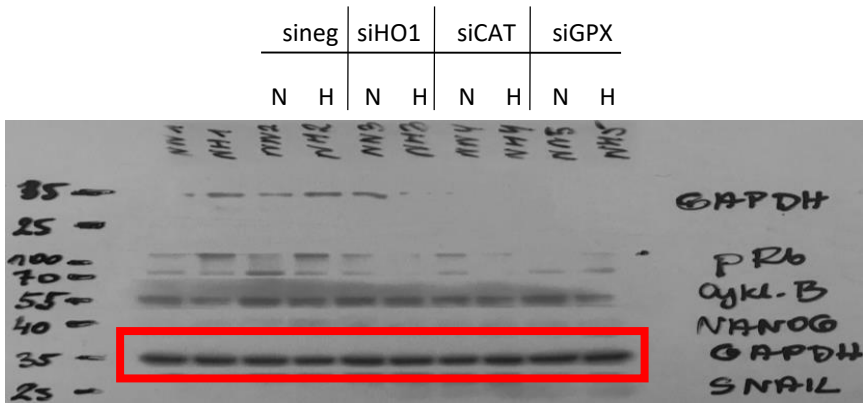

Fig. A.II.36

NANOG

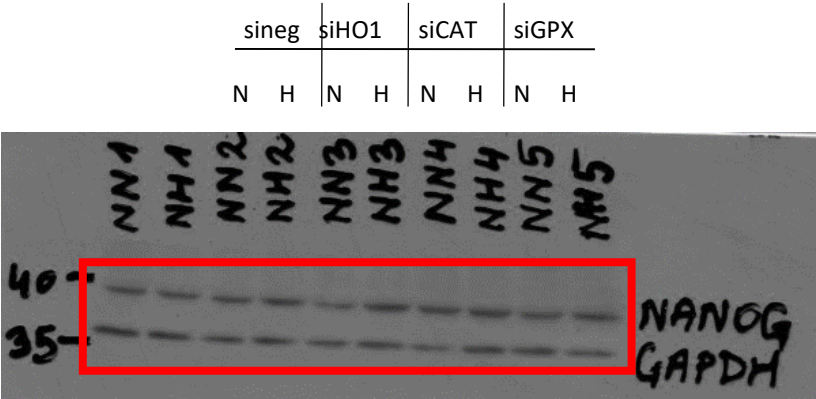

Fig. A.II.37

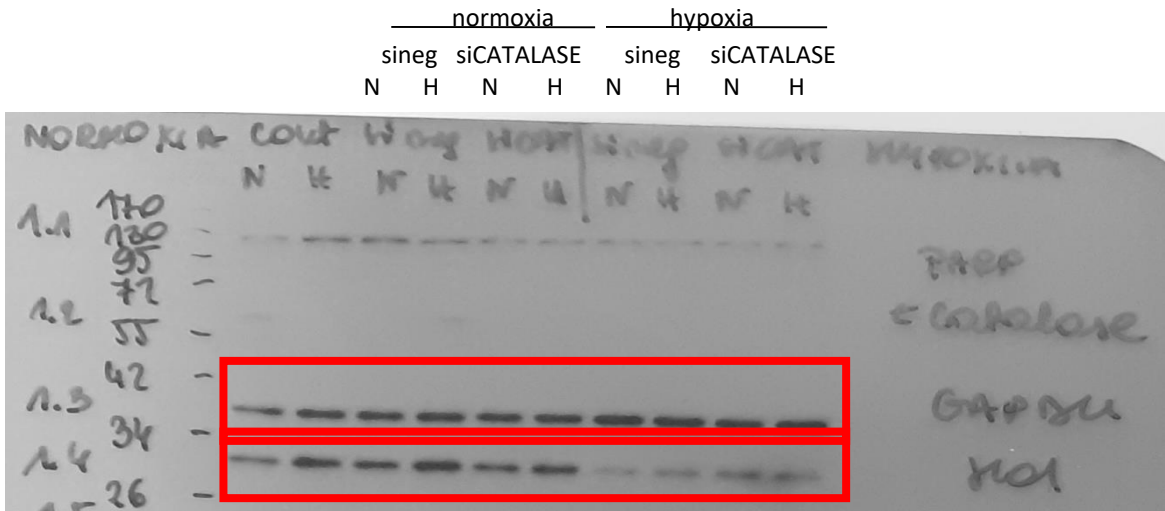

Fig. A.II.38



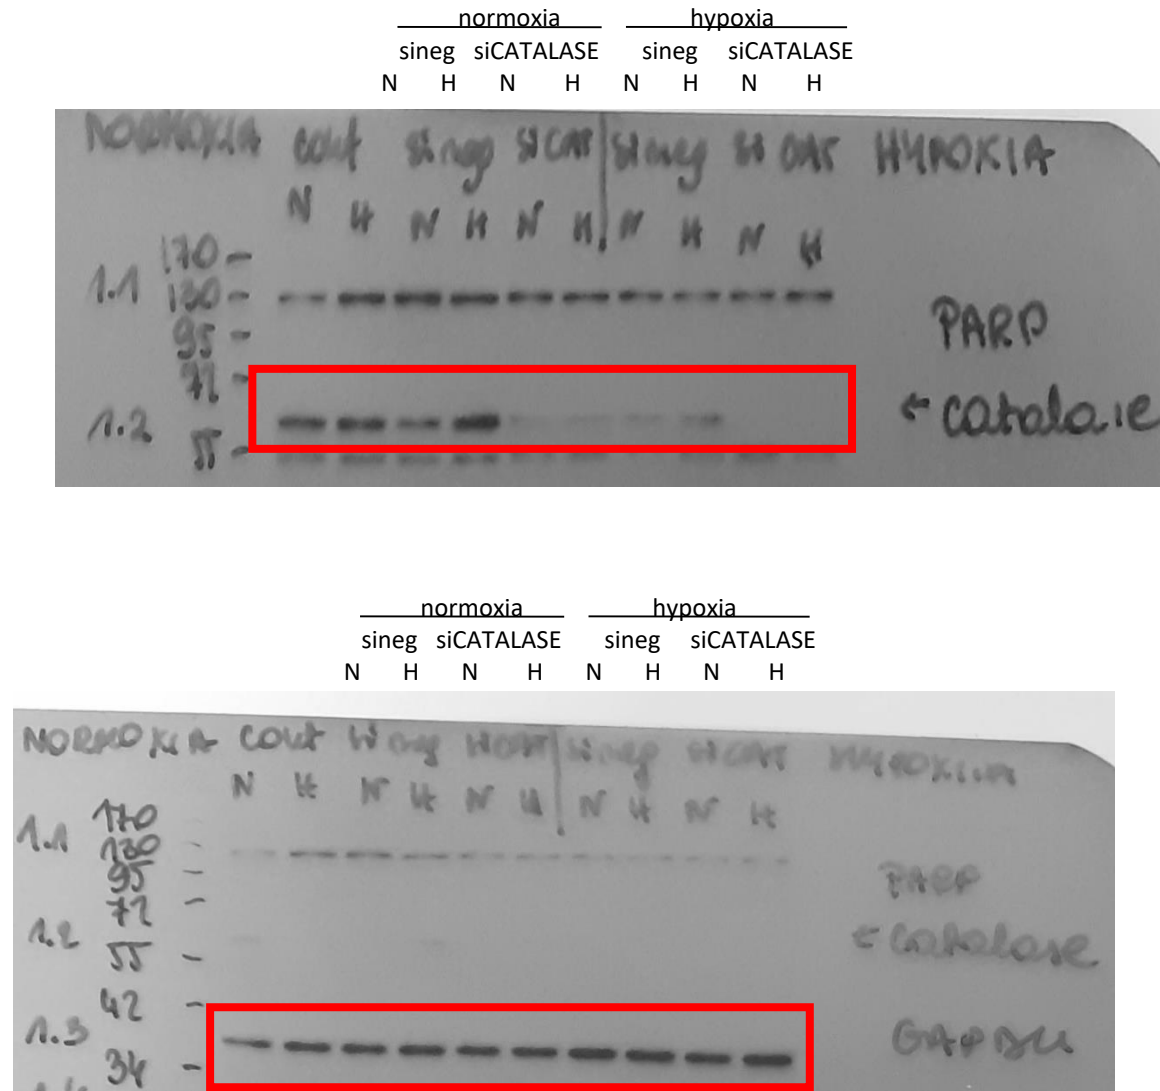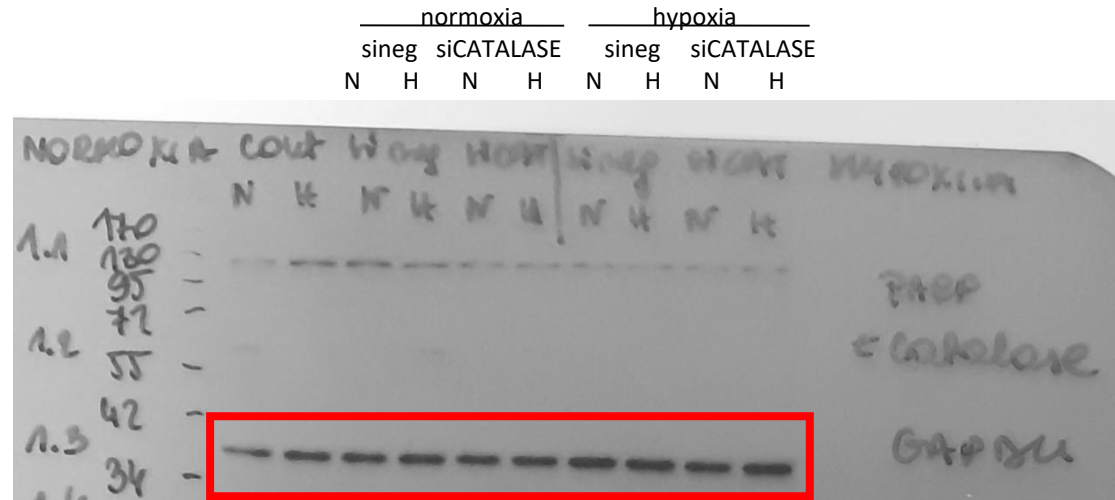

Fig. A.II.39

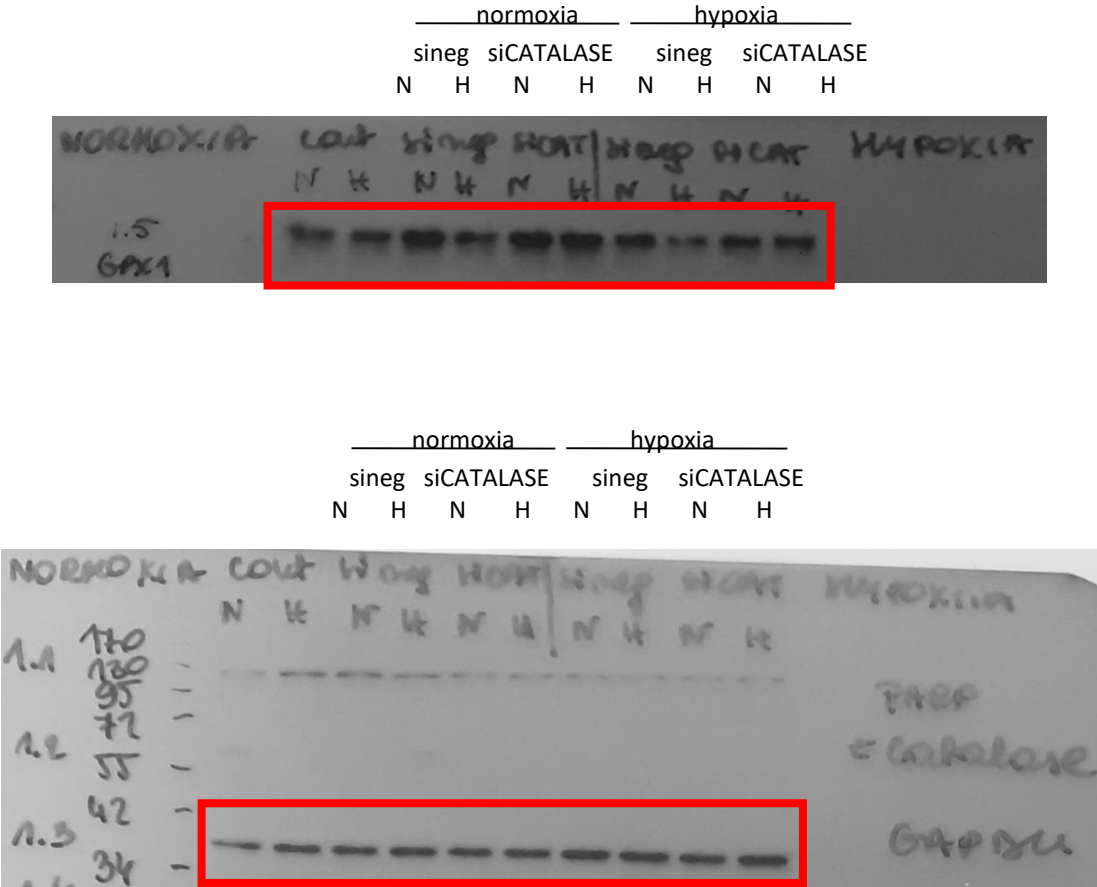

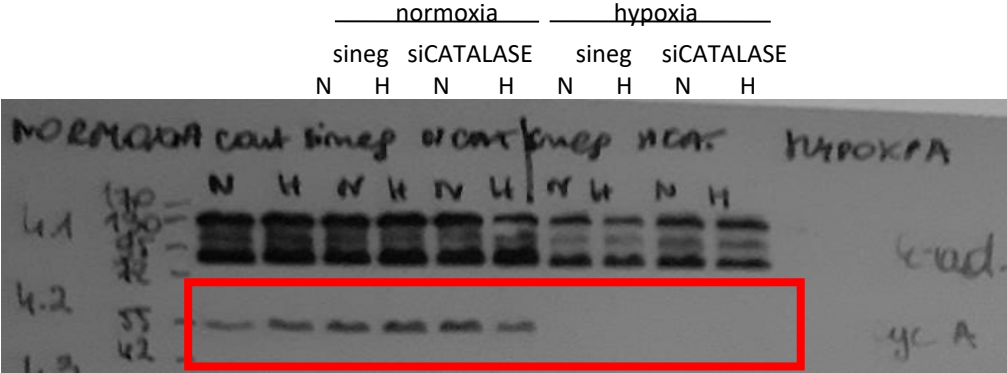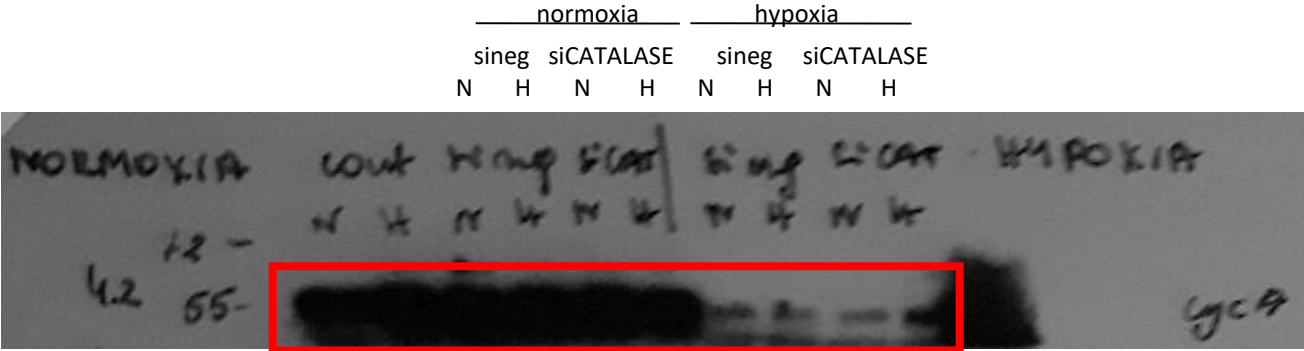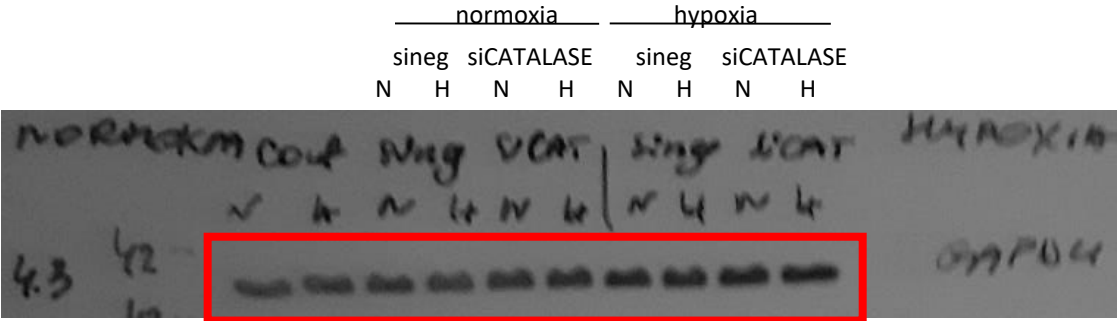

Fig. A.II.41

cyclin B

| normoxia |   |            |   | hypoxia |   |            |   |
|----------|---|------------|---|---------|---|------------|---|
| sineg    |   | siCATALASE |   | sineg   |   | siCATALASE |   |
| N        | H | N          | H | N       | H | N          | H |

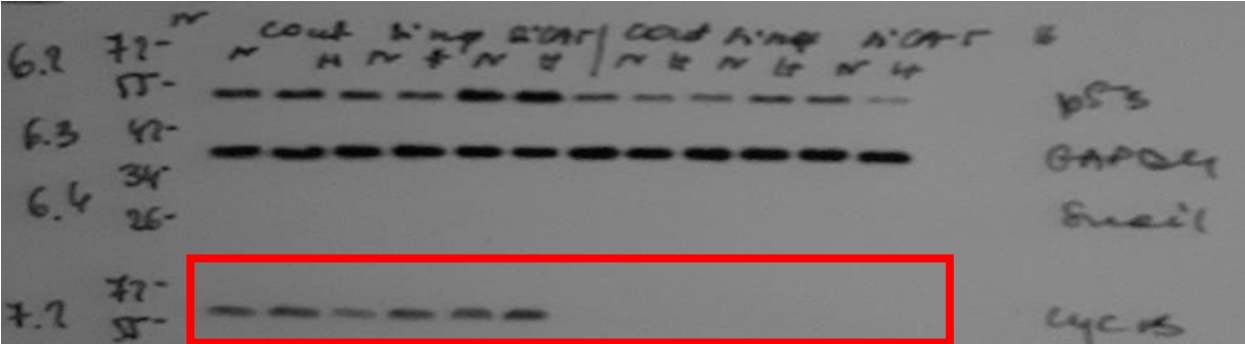

| normoxia |   |            |   | hypoxia |   |            |   |
|----------|---|------------|---|---------|---|------------|---|
| sineg    |   | siCATALASE |   | sineg   |   | siCATALASE |   |
| N        | H | N          | H | N       | H | N          | H |

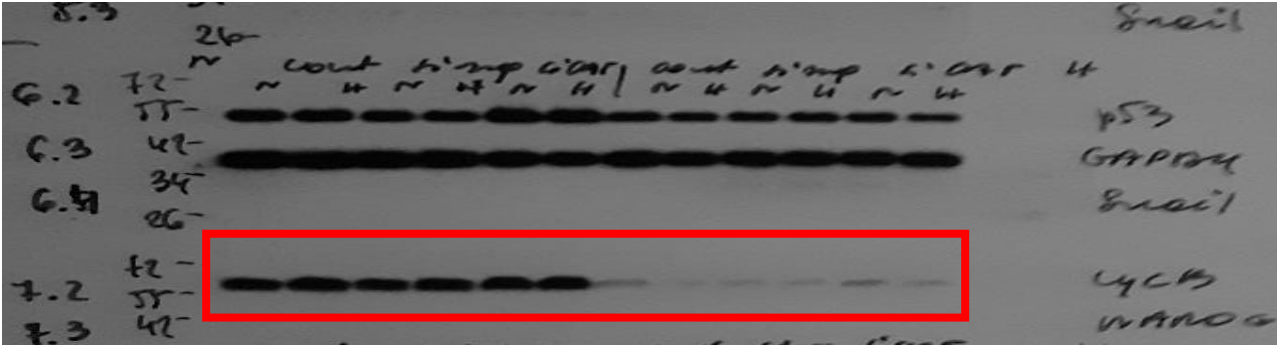

| normoxia |   |            |   | hypoxia |   |            |   |
|----------|---|------------|---|---------|---|------------|---|
| sineg    |   | siCATALASE |   | sineg   |   | siCATALASE |   |
| N        | H | N          | H | N       | H | N          | H |

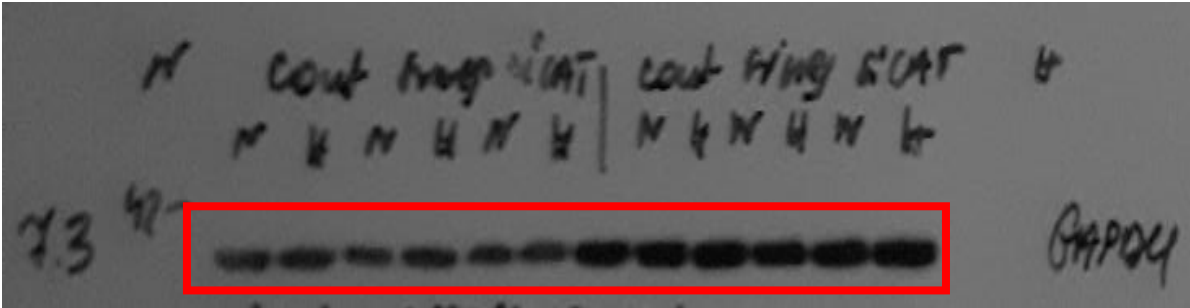

Fig. A.II.42

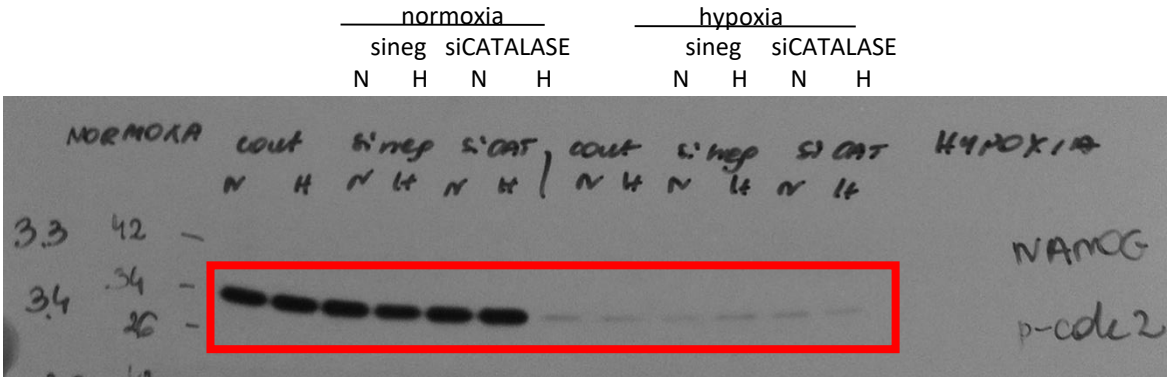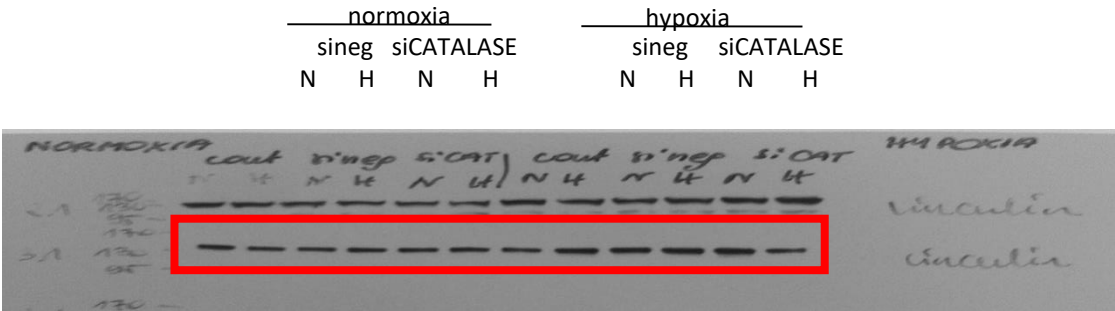

Fig. A.II.43

p-Rb

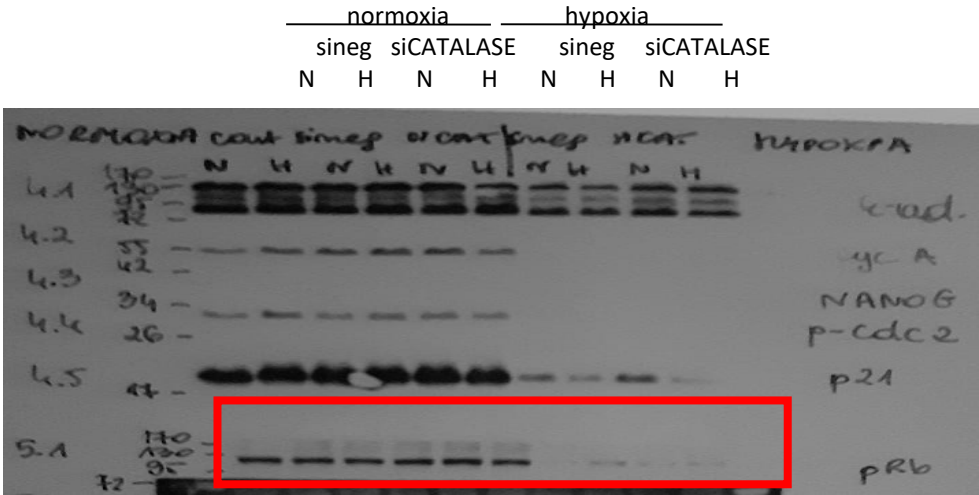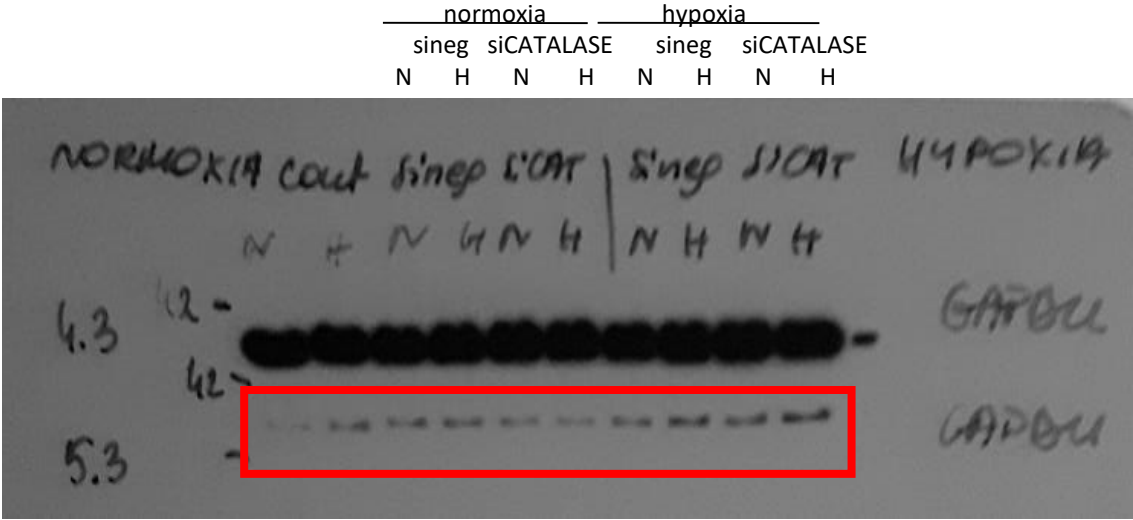

Fig. A.II.44

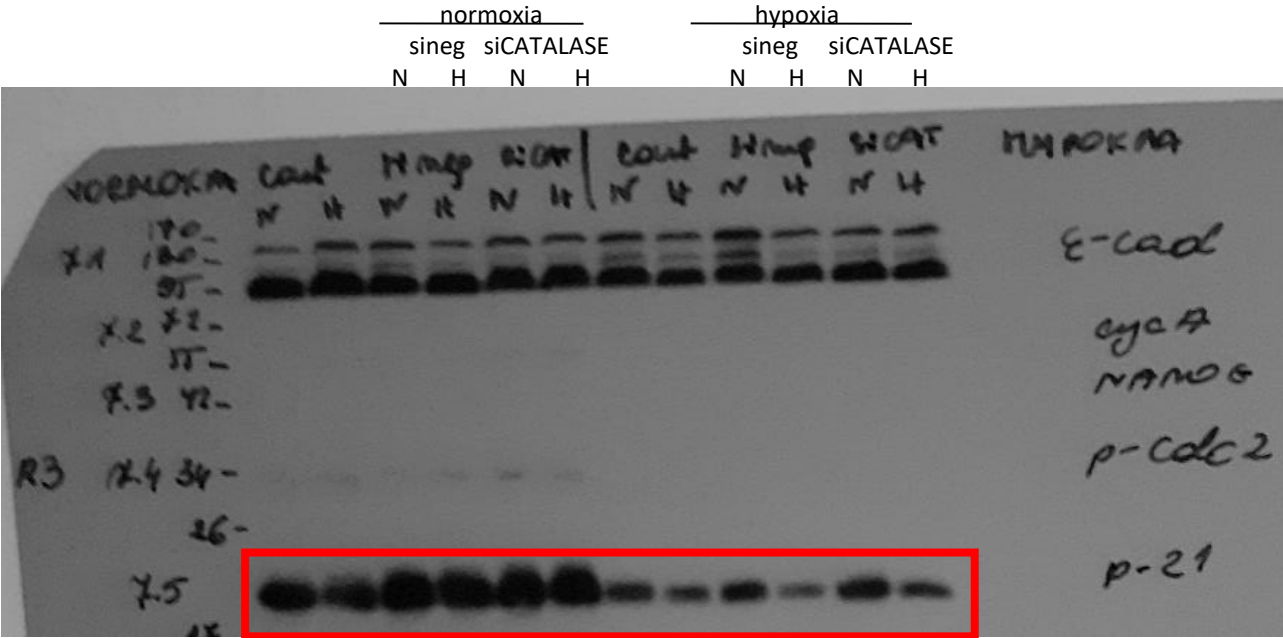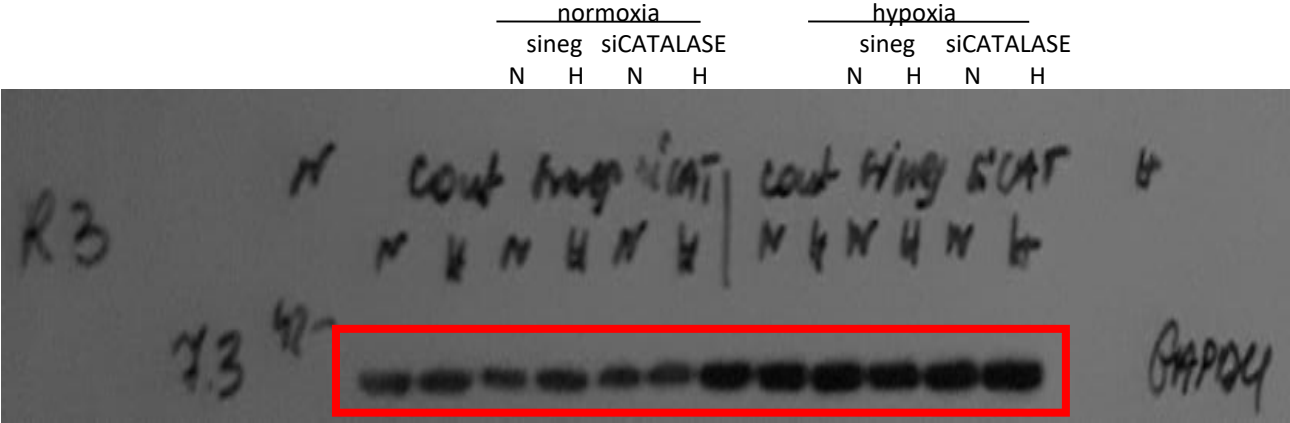

Fig. A.II.45



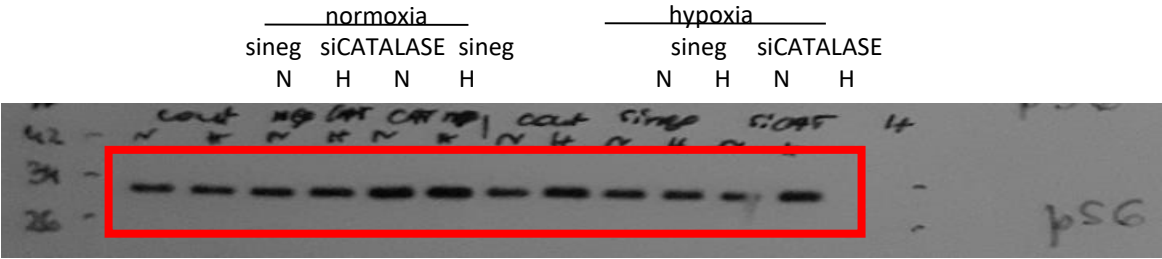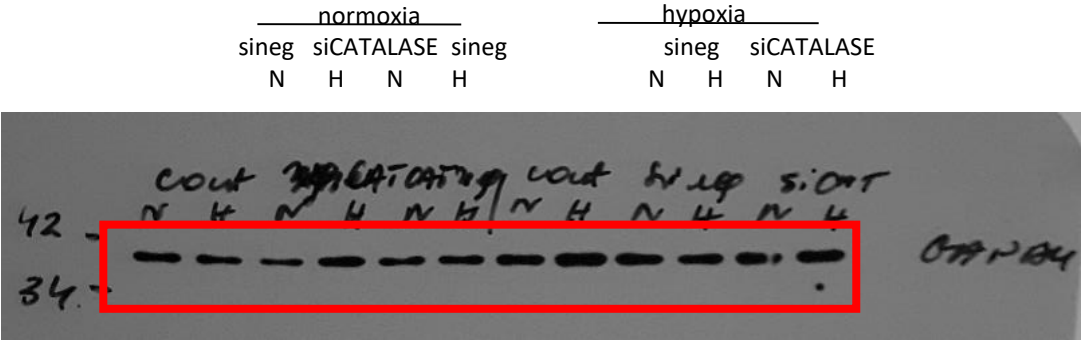

Fig. A.II.46

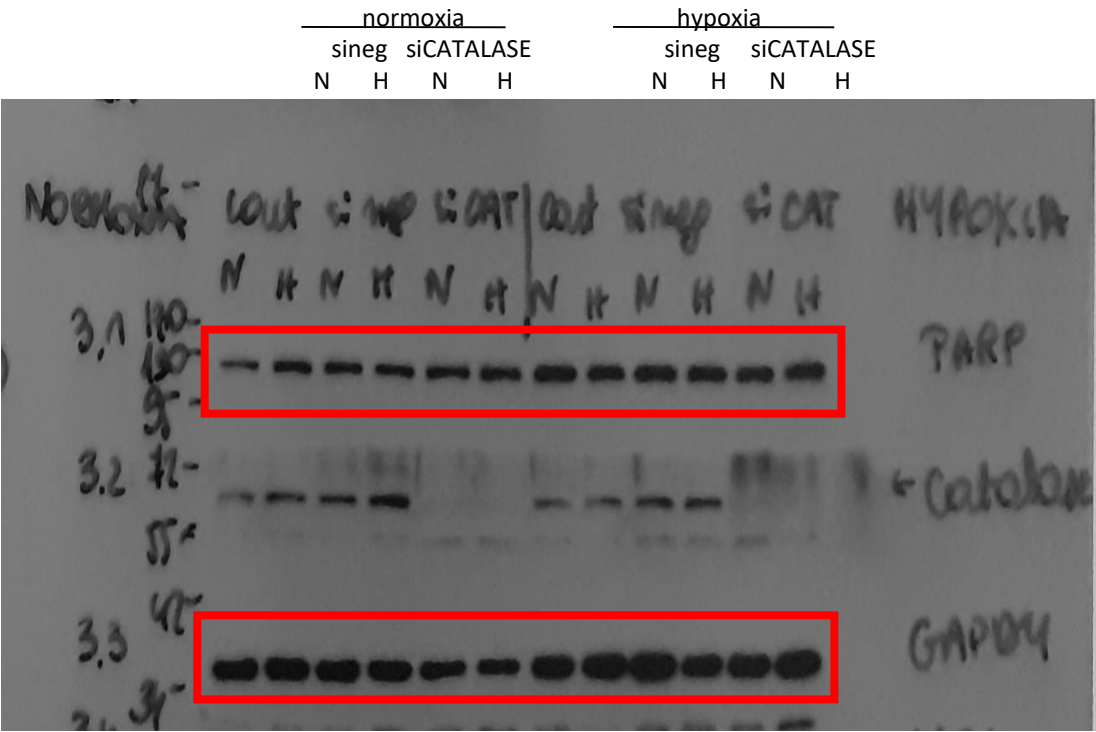

Fig. A.II.47

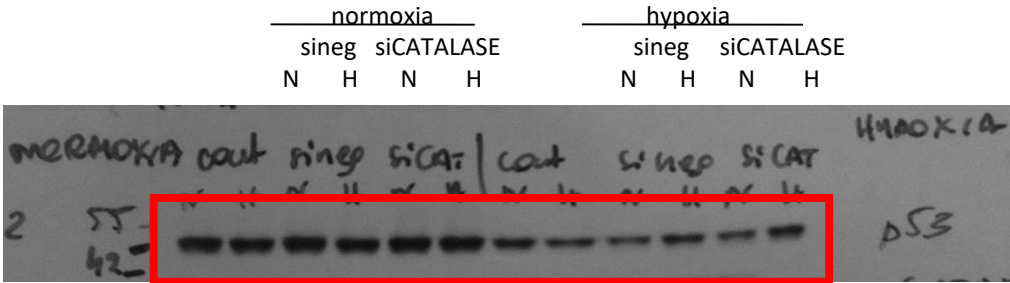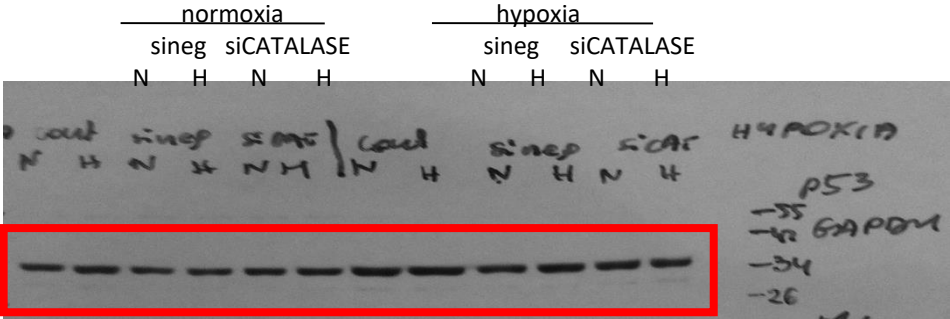

Fig. A.II.48

E-cadherin

| normoxia |   |            |   | hypoxia |   |            |   |
|----------|---|------------|---|---------|---|------------|---|
| sineg    |   | siCATALASE |   | sineg   |   | siCATALASE |   |
| N        | H | N          | H | N       | H | N          | H |

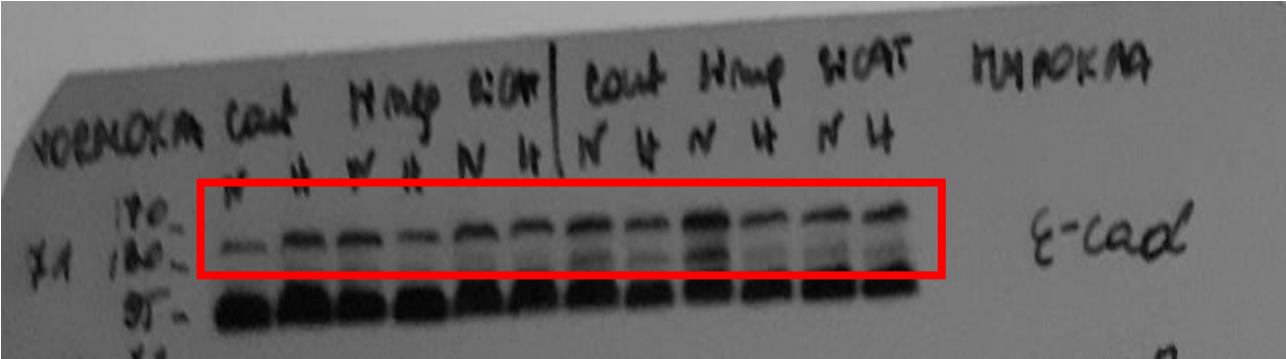

| normoxia |   |            |   | hypoxia |   |            |   |
|----------|---|------------|---|---------|---|------------|---|
| sineg    |   | siCATALASE |   | sineg   |   | siCATALASE |   |
| N        | H | N          | H | N       | H | N          | H |

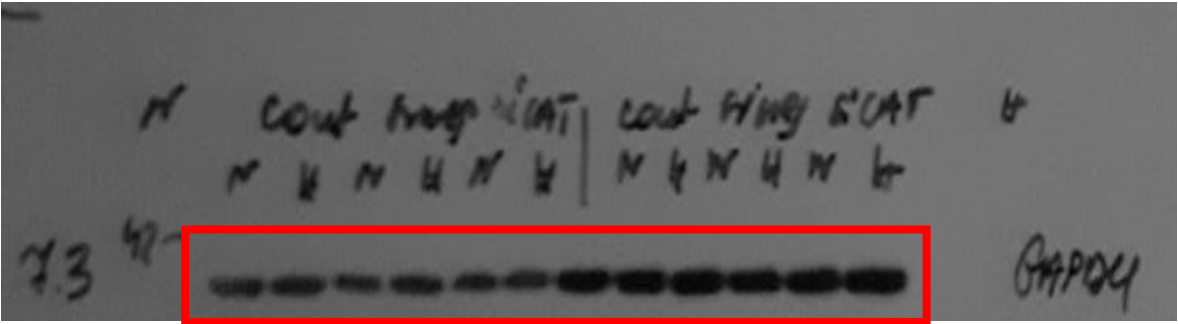

Fig. A.II.49

Snail

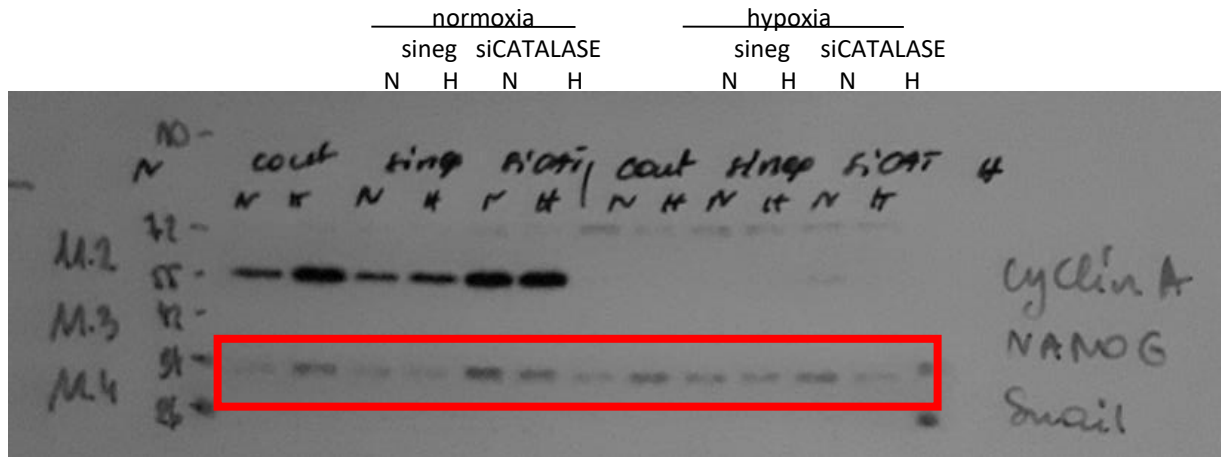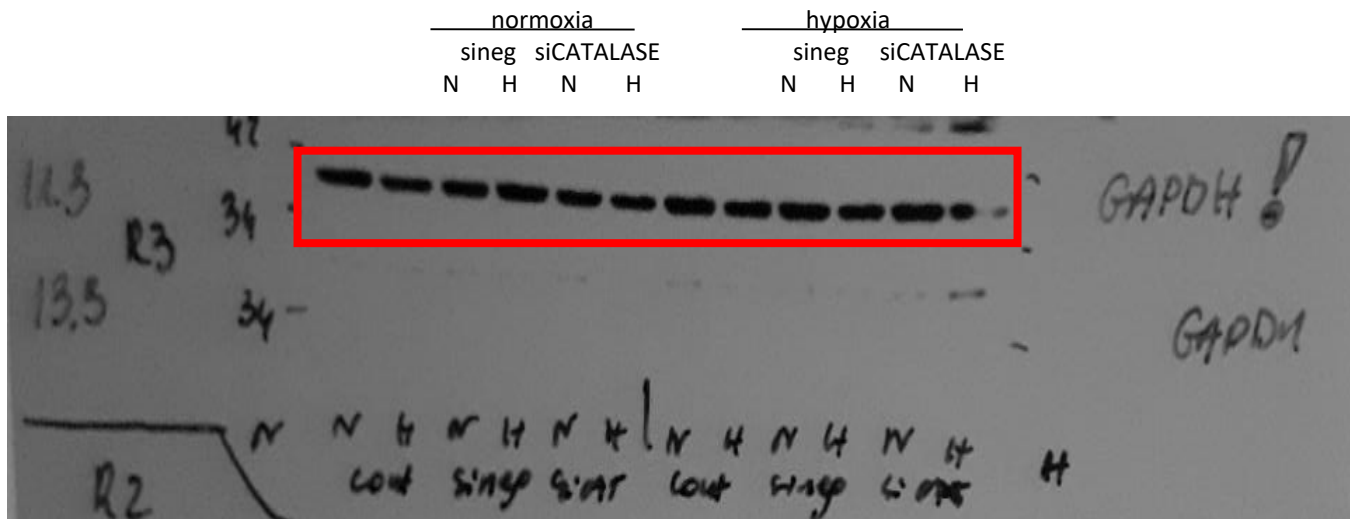

NANOG

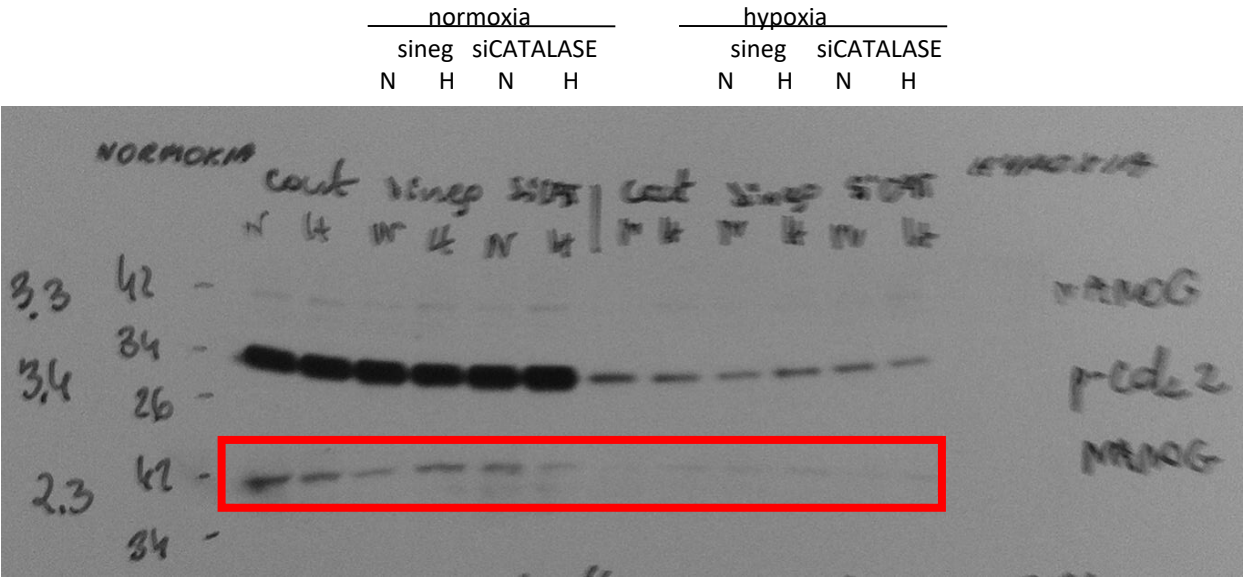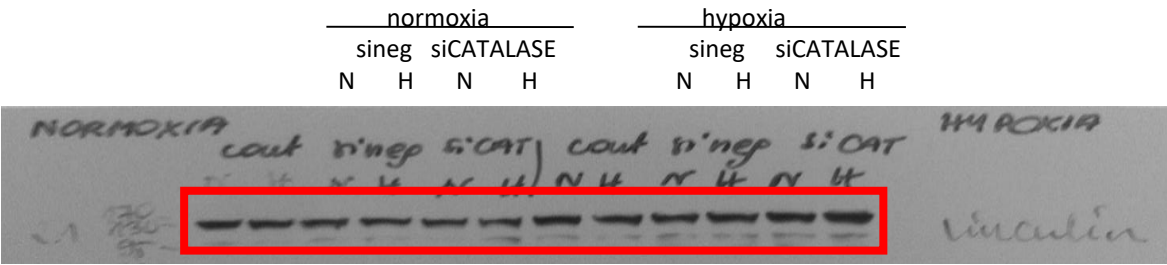

Fig. A.II.51
